# Supplementary material
Source: Research Square preprint supplement (doi:10.21203/rs.3.rs-8773066/v1)
Supplement: Supplementary file 1 [file f41c767d26e2a1bfa57ddc67.pdf]

# Supporting Information: RECURSUM—Automated Code Generation for Recurrence Relations Exceeding Expert Optimization via LayeredCodegen

Rubén Darío Guerrero  
NeuroTechNet S.A.S, 1108831, Bogota, Colombia  
Quantum and Computational Chemistry Group,  
Universidad Nacional de Colombia,  
Bogota, Colombia

February 2, 2026

## Abstract

Automated code generation can systematically exceed expert hand-optimization for recurrence relations—computational primitives ubiquitous in orthogonal polynomials, special functions, numerical integration, and molecular integral evaluation. We present RECURSUM, a Python-based domain-specific language generating optimized C++ for arbitrary recurrence relations via three backends: template metaprogramming for compile-time evaluation, a novel LayeredCodegen backend with architectural optimizations, and runtime loop-based evaluation. The DSL uses einsum-inspired notation to specify recurrences, validity constraints, and base cases in 10–30 lines of Python, generating 650+ lines of production C++.

LayeredCodegen achieves  $9.8\times$  speedup over expert hand-written implementations and  $1.9\times$  over template metaprogramming for McMurchie-Davidson Hermite coefficients. Architecture analysis reveals three quantifiable effects: (1) zero-copy output parameters eliminate return-by-value overhead (70–80% of speedup), (2) guaranteed function inlining eliminates compiler-refused overhead (15–20%), (3) exact-sized stack buffers achieve 100% cache efficiency vs 27% for MAX-sized arrays (5–10%).

We validate on 24 recurrence types spanning pure mathematics (Legendre, Chebyshev, Hermite, Laguerre polynomials), numerical analysis (Clenshaw, Golub-Welsch), and quantum chemistry (McMurchie-Davidson, Rys quadrature, Boys function). Production benchmarks show speedups propagate to complete algorithms, with generated code matching expert baselines within 3.3%.

RECURSUM demonstrates that systematic code generation serves as the performance ceiling for recurrence algorithms. By eliminating the dual expertise barrier (domain knowledge + C++ metaprogramming), the framework democratizes high-performance scientific computing—establishing a paradigm where automated generation systematically exceeds manual optimization.

## 1 Introduction

Recurrence relations are fundamental computational primitives across pure and applied mathematics. The canonical reference *Handbook of Mathematical Functions* [1] catalogs approximately 240 recurrence relations among its 2400+ mathematical formulas. Similarly, the *NIST Digital Library of Mathematical Functions* [2] provides recurrence formulas for essentially every classical special function: orthogonal polynomials (Legendre, Chebyshev, Hermite, Laguerre, Jacobi), Bessel functions, hypergeometric functions, and elliptic integrals. In *Mathematical Methods for Physicists* [3], over 200 recurrence relations appear for applications in quantum mechanics, electrodynamics, and statistical mechanics.

The ubiquity of recurrence relations across mathematical domains creates both a challenge and an opportunity for systematic optimization. Consider representative examples across the knowledge landscape:

- **Pure Mathematics:** Orthogonal polynomial evaluation via Bonnet’s three-term recursion, binomial coefficients through Pascal’s triangle, Fibonacci sequences, continued fraction expansions, hypergeometric function evaluation
- **Numerical Analysis:** Clenshaw’s algorithm for Chebyshev series summation, Golub-Welsch algorithm for Gaussian quadrature weights, Miller’s backward recurrence algorithm for numerically stable Bessel function evaluation, three-term recurrences in Lanczos and Arnoldi iterations for eigenvalue problems
- **Computational Physics:** Spherical harmonics via associated Legendre polynomial recurrences, multipole expansions using addition theorems, Green’s function recursions in scattering theory, Wigner 3-j and 6-j symbols, scattering amplitude computations
- **Quantum Chemistry:** Molecular integral evaluation via McMurchie-Davidson, Obara-Saika, and Rys quadrature recurrences; Boys function for Coulomb integrals; modified spherical Bessel functions for Slater-type orbitals; derivative recurrences for analytical gradients and Hessians
- **Computational Statistics:** Sequential Monte Carlo particle filters, recursive Bayesian estimation, Kalman filter update equations, autoregressive moving average (ARMA) models
- **Signal Processing:** Recursive digital filter implementations (IIR filters), wavelet transforms using orthogonal polynomial bases, fast Fourier transform butterfly operations, z-transform evaluations

Despite this diversity, recurrence relations share common computational structure: multi-term linear recursions with validity constraints, base cases, and index-dependent coefficients. The mathematical form

$$f_n = \alpha_n f_{n-1} + \beta_n f_{n-2} + \dots + \gamma_n \tag{1}$$

appears in contexts ranging from Legendre polynomial evaluation ( $P_n(x) = \frac{(2n-1)xP_{n-1}(x) - (n-1)P_{n-2}(x)}{n}$ ) to McMurchie-Davidson Hermite coefficients ( $E_t^{i,j} = \frac{1}{2^p} E_{t-1}^{i-1,j} + X_{PA} E_t^{i-1,j} + (t+1) E_{t+1}^{i-1,j}$ ).

## 1.1 The Implementation Challenge

Traditional implementations use runtime loops with conditional branches to handle different index cases and boundary conditions. This approach has several fundamental limitations:

1. **Branch mispredictions** reduce instruction throughput on modern superscalar processors (15–20 cycle penalty on Intel architectures)
2. **Indirect function calls** prevent inlining and disable interprocedural optimizations
3. **Validity constraints checked at runtime** add overhead for every evaluation, despite indices often being compile-time constants in many applications
4. **SIMD vectorization opportunities** are often missed due to control flow complexity and dynamic indexing patterns
5. **Domain-specific implementations** duplicate optimization effort—each mathematical domain (orthogonal polynomials, special functions, molecular integrals) typically implements recurrences independently despite shared computational structure

Expert-written codes address these issues through aggressive manual optimization: loop unrolling, template specialization for specific index values, careful SIMD intrinsics, and hand-tuned cache blocking. However, this approach is labor-intensive (weeks to months of C++ development per recurrence type), error-prone (template metaprogramming has steep learning curve), and difficult to maintain when new recurrence formulas need to be added. The expertise required—deep knowledge of both the mathematical domain *and* C++ template metaprogramming—limits who can contribute high-performance implementations.

## 1.2 RECURSUM: A Universal DSL for Recurrence Relations

In this work, we present **RECURSUM**, a Python-based domain-specific language that automatically generates optimized C++ code for arbitrary recurrence relations across mathematical domains. The framework provides a declarative interface where users specify recurrence rules, validity constraints, and base cases in 10–30 lines of Python, and the system generates production-grade C++ implementations via three complementary backends:

1. **Template Metaprogramming (TMP) Backend:** Generates SFINAE-constrained template specializations where:
  - Recurrence relations are evaluated entirely at compile time via template recursion
  - Invalid index combinations are eliminated via `std::enable_if` (SFINAE)
  - All loops are fully unrolled, eliminating branching overhead
  - Multiple equivalent branches can be averaged for numerical stability
2. **LayeredCodegen Backend (Novel Contribution):** Generates layer-by-layer evaluation code with output parameters, forced inlining, and exact-sized buffers, achieving **9.8× speedup over hand-written implementations** and **1.9× speedup over traditional TMP** through systematic application of architectural optimizations
3. **Runtime Backend:** Generates compact loop-based code that fits in instruction cache, trading specialization overhead for reduced cache pressure when switching between different recurrence parameter combinations

All three backends are generated from the *same* DSL specification. The choice of backend is a performance tuning decision based on workload characteristics (cache-hot repeated evaluations vs cache-cold frequent switching), not an algorithmic difference.

### 1.3 Quantum Chemistry as Primary Validation Domain

While RECURSUM is a general-purpose framework applicable to any recurrence relation, we validate it extensively using **quantum chemistry integral evaluation** as the primary demonstration domain for three strategic reasons:

1. **Extreme performance demands:** Molecular integrals must be computed billions of times per self-consistent field (SCF) iteration in electronic structure calculations. A single geometry optimization of a medium-sized molecule (50–100 atoms) requires  $\sim 10^{12}$ – $10^{14}$  integral evaluations. This represents one of the most performance-critical applications of recurrence relations in computational science, ensuring that RECURSUM’s optimizations are validated under the most demanding conditions.
2. **Algorithmic diversity:** Quantum chemistry encompasses multiple recurrence families with fundamentally different mathematical structures:
  - McMurchie-Davidson: Multi-index tensor recurrences with complex validity domains ( $i + j \geq t$ )
  - Obara-Saika: Vertical and horizontal recurrence relations
  - Rys quadrature: Coupled recurrences for quadrature weights and Hermite coefficients
  - Boys function: Single-index special function recurrences with numerical stability challenges

This diversity validates RECURSUM’s generality—if the framework succeeds for these varied structures, it will generalize to simpler recurrence types in other domains.

3. **Expert baselines for validation:** Established libraries (Libint2 [4], SIMINT [5], Q-Chem, Psi4, GAMESS) provide expert hand-optimized baselines developed over decades by performance-focused computational chemists. Matching or exceeding these implementations provides rigorous validation that RECURSUM-generated code achieves true production-grade performance, not merely academic benchmarks.

The comprehensive benchmarks (Section 5) demonstrate that RECURSUM-generated code matches expert hand-coded validation baselines within 3.3% while requiring orders of magnitude less development effort (hours vs weeks). This validates the framework’s utility across mathematical domains where similar performance demands exist but expert-optimized implementations are unavailable or prohibitively expensive to develop.

## 1.4 Major Contribution: LayeredCodegen Surpasses Hand-Written and Template Code

A central result of this work is the development of **LayeredCodegen**, a novel code generation backend that systematically outperforms both traditional template metaprogramming (TMP) and expert hand-written layered implementations. For McMurchie-Davidson Hermite expansion coefficients, LayeredCodegen achieves:

- **9.8× speedup** over hand-written layered implementation (0.207 ns vs 2.018 ns for ss shell)
- **1.9× speedup** over template metaprogramming baseline (0.207 ns vs 0.403 ns)
- **1.8–10× consistent advantage** across all angular momentum values ( $L = 0$  to  $L = 8$ )

This performance advantage arises from three architectural optimizations that are systematically applied by the code generator:

**1. Zero-Copy Output Parameters** LayeredCodegen uses output pointer parameters (`void compute(Vec8d* out, ...)`) rather than return-by-value, eliminating memory copy overhead. The hand-written implementation returns `std::array<Vec8d, MAX_SIZE>` (736 bytes), requiring 23× more memory bandwidth than LayeredCodegen’s direct writes to caller-allocated storage.

### 2. Guaranteed Function Inlining

All LayeredCodegen functions use `RECURSUM_FORCEINLINE` macros that compile to `__attribute__((always_inline))` (GCC/Clang)

or `__forceinline` (MSVC), guaranteeing compiler inlining across all platforms. The hand-written implementation lacks these directives, causing the compiler to refuse inlining due to large return values, incurring 0.3–0.5 ns function call overhead per invocation.

**3. Exact-Sized Stack Buffers** LayeredCodegen generates buffers sized exactly to the required number of coefficients (`Vec8d prev[nA + nB + 1]`), while hand-written code uses `MAX_SIZE` arrays (92 elements for  $L_{\max} = 9$ ), polluting 12 cache lines even when computing a single coefficient. The exact-sized approach achieves 100% cache efficiency vs 27% for MAX-sized arrays.

**Implications for Scientific Computing** This result demonstrates that *systematic automated code generation can outperform manual optimization*, even when the manual code is written by experts aware of performance best practices. The key insight is that certain optimizations (output parameters, forced inlining, exact sizing) are tedious and error-prone to apply manually but trivial for a code generator to apply systematically across all recurrence types. This opens the possibility of DSL-based code generation serving as the **performance ceiling** for recurrence-based algorithms in scientific computing, rather than merely matching hand-coded performance.

## 1.5 Related Work

**Template metaprogramming in scientific computing.** The Eigen library [6] pioneered expression templates for linear algebra, demonstrating that compile-time code generation can match hand-optimized BLAS performance. The Blaze library [7] extends this to advanced SIMD vectorization. Boost.Hana [8] provides metaprogramming utilities for compile-time computation. However, these frameworks target specific domains (linear algebra, expression evaluation) and require deep C++ template expertise. **RECURSUM differs fundamentally:** it provides a Python DSL accessible to non-C++-experts and targets the general class of recurrence relations across mathematics, not a specific application domain. Moreover, our LayeredCodegen backend demonstrates a novel approach distinct from traditional template metaprogramming, achieving superior performance through layer-by-layer evaluation with output parameters—an architectural pattern not explored in prior TMP frameworks.

**Domain-specific languages for performance.** High-level DSLs for performance-critical domains include Halide [9] for image processing (production use at Google, Adobe), TACO [10] for sparse tensor algebra (100× faster than NumPy for sparse workloads), Spiral [11] for DSP transforms (competitive with MKL, FFTW),

and Tiramisu [12] for general polyhedral compilation. These systems separate algorithm specification from performance optimization through staged compilation or auto-tuning. RECURSUM follows this philosophy: recurrence mathematics are specified declaratively, while the code generator handles low-level optimization (SIMD, loop unrolling, branch elimination). **Research gap:** Existing DSLs target stencils (Halide), tensors (TACO), or transforms (Spiral), but no framework addresses the general class of recurrence relations across pure and applied mathematics. Furthermore, these DSLs generate runtime code; RECURSUM uniquely combines DSL-based specification with C++ template metaprogramming for compile-time evaluation, enabling zero-overhead recurrence evaluation when indices are compile-time constants.

**Layer-by-layer code generation.** Our LayeredCodegen backend represents a novel approach distinct from both template metaprogramming and symbolic code generation. While template metaprogramming instantiates separate code for each index combination and symbolic approaches generate closed-form expressions, LayeredCodegen systematically generates code that computes all values at a given recurrence layer simultaneously. This approach achieves  $9.8\times$  speedup over hand-written layered implementations and  $1.9\times$  over traditional TMP by eliminating architectural overhead (return-by-value copies, missing inlining, cache pollution) that manual implementations suffer from. To our knowledge, this is the first demonstration that automated code generation can systematically outperform expert hand-coded implementations by applying architectural optimizations that are tedious to implement manually but trivial to generate automatically.

**Symbolic code generation for quantum chemistry.** The Libint2 library [4] pioneered symbolic code generation for Gaussian integrals using a custom C++ compiler that generates optimized integral kernels from symbolic expressions. Libint2 focuses on Obara-Saika and Head-Gordon-Pople recursions for electron repulsion integrals, with extensive compile-time specialization. Our DSL complements this approach: while Libint2 targets a specific family of integral recurrences with deeply optimized symbolic algebra, our framework provides a *general-purpose* tool for arbitrary recurrence relations across quantum chemistry and beyond. The DSL’s three-backend architecture (TMP, LayeredCodegen, runtime) offers flexibility for workload-dependent optimization that Libint2’s compile-time-only approach cannot provide. Moreover, RECURSUM’s Python DSL is significantly more accessible than Libint2’s complex C++-based specification language.

**Code generation for recurrence relations.** Existing symbolic mathematics systems (SymPy [13], Mathematica) can generate code for recurrence relations by symbolically expanding formulas and applying common subexpression elimination. However, this approach does not exploit recurrence structure: our benchmarks show SymPy-generated code is  $2\text{--}2.5\times$  slower than LayeredCodegen due to expression explosion at high indices (150+ terms after CSE at  $L = 8$ ) causing instruction cache pressure. RECURSUM explicitly exploits layered structure for compile-time CSE, reusing each layer’s results across multiple index values—an optimization unavailable to symbolic systems that treat each index combination independently.

## 1.6 Paper Organization and Research Questions

This manuscript answers four fundamental research questions about automated code generation for recurrence relations:

1. **Generality:** Can a unified DSL handle diverse recurrence types across pure mathematics, numerical analysis, and quantum chemistry?  
*Answer (Section 4):* Yes. RECURSUM successfully generates code for 24 recurrence types spanning orthogonal polynomials (Legendre, Chebyshev, Hermite, Laguerre), special functions (Bessel, Boys, incomplete gamma), molecular integrals (McMurchie-Davidson, Rys, Coulomb auxiliary), and combinatorics (binomial coefficients, Fibonacci). All implementations validated against SciPy/NumPy with machine-precision accuracy ( $<10^{-15}$  relative error).
2. **Performance:** Can automated code generation match expert hand-optimized implementations?  
*Answer (Section 5):* Yes, and exceed them. DSL-generated template code matches expert baselines within 3.3%. More significantly, LayeredCodegen systematically outperforms hand-written implementations by  $9.8\times$  and traditional template metaprogramming by  $1.9\times$  through automatic application of architectural

optimizations.

3. **Architecture:** What architectural optimizations explain LayeredCodegen’s superior performance?

*Answer (Section 5.5):* Three quantifiable effects: (1) Output parameters eliminate  $23\times$  memory bandwidth waste from return-by-value (explains 70–80% of speedup), (2) Forced inlining eliminates 0.3–0.5 ns function call overhead (explains 15–20%), (3) Exact-sized buffers achieve 100% cache efficiency vs 27% (explains 5–10%). Microarchitectural model predicts 1.6 ns overhead, matching measured 1.615 ns gap within 1%.

4. **Implications:** Does this establish a new paradigm for scientific software development?

*Answer (Sections 6 and 7):* Yes. The demonstration that automated code generation systematically exceeds expert optimization challenges the assumption that critical performance code must be hand-written. DSL-based code generation can serve as the *performance ceiling* by avoiding pitfalls even expert programmers encounter, suggesting a paradigm shift for scientific computing.

**Section-by-Section Roadmap** Section 2 introduces recurrence relations across mathematical domains, establishing common computational structure that enables systematic code generation. Section 3 presents the SFINAE framework and three-backend architecture, explaining how template metaprogramming, LayeredCodegen, and runtime approaches provide complementary performance characteristics from unified DSL specifications. Section 4 demonstrates the DSL on 24 recurrence types, validating breadth and correctness. Section 5 provides comprehensive performance analysis: algorithmic comparison (McMurchie-Davidson vs Rys quadrature), code generation comparison (TMP vs LayeredCodegen vs runtime), and production validation (alkane scaling benchmarks). Section 5.5 delivers the critical architectural analysis explaining LayeredCodegen’s  $9.8\times$  speedup through quantitative breakdown of memory bandwidth, function inlining, cache efficiency, and instruction-level parallelism. Section 6 synthesizes DSL design insights, compares with alternative approaches (symbolic, Halide, TACO), examines practical deployment, and identifies future directions. Section 7 articulates the paradigm shift: automated code generation as performance ceiling, not productivity compromise, with broader implications for computational mathematics.

**Contributions Summary** This work makes four principal contributions: (1) **RECURSUM DSL:** First general-purpose framework for recurrence relations with Python accessibility (eliminates C++ TMP barrier), (2) **LayeredCodegen backend:** Novel layer-by-layer code generation achieving  $9.8\times$  speedup over expert implementations through systematic architectural optimization, (3) **Comprehensive validation:** 24 recurrence types across domains with rigorous performance benchmarks and microarchitectural analysis, (4) **Paradigm demonstration:** First empirical proof that automated code generation can systematically exceed expert manual optimization, establishing DSLs as potential performance ceiling for scientific computing.

## 2 Recurrence Relations in Molecular Electronic Structure

### 2.1 Gaussian-Type Orbitals

Gaussian-type orbitals (GTOs) dominate modern quantum chemistry due to the analytical tractability of their overlap and electron repulsion integrals (ERIs). The McMurchie-Davidson algorithm evaluates four-center ERIs over GTOs through Hermite Gaussian expansions, where expansion coefficients  $E_t^{ij}$  satisfy three-term recurrence relations. Similarly, the Obara-Saika method employs vertical and horizontal recurrences directly on primitive GTOs. Both approaches rely heavily on the Boys function

$$F_n(T) = \int_0^1 t^{2n} e^{-Tt^2} dt, \quad (2)$$

which itself satisfies recurrence relations.

### 2.2 Slater-Type Orbitals

Slater-type orbitals (STOs), defined as

$$\chi_{nlm}(\mathbf{r}) = N r^{n-1} e^{-\zeta r} Y_l^m(\theta, \phi), \quad (3)$$

provide superior exponential decay at the nucleus and cusps at nuclear positions, making them physically more realistic than GTOs. However, multi-center ERIs over STOs lack closed-form expressions, requiring specialized techniques:

- **Translation methods** (Guseinov, Filter-Steinborn): Expand STOs centered at different nuclei using addition theorems for Bessel functions
- **Fourier transform methods** (Harris-Michaels): Evaluate integrals in momentum space
- **Numerical quadrature**: Direct integration over spatial coordinates

All analytical STO integral methods involve **modified spherical Bessel functions** of the first and second kind:

$$i_n(x) = \sqrt{\frac{\pi}{2x}} I_{n+1/2}(x), \quad (4)$$

$$k_n(x) = \sqrt{\frac{\pi}{2x}} K_{n+1/2}(x) \cdot \frac{2}{\pi}, \quad (5)$$

which satisfy three-term upward recurrences:

$$i_n(x) = i_{n-2}(x) - \frac{2n-1}{x} i_{n-1}(x), \quad (6)$$

$$k_n(x) = k_{n-2}(x) + \frac{2n-1}{x} k_{n-1}(x). \quad (7)$$

The upward recurrence for  $i_n(x)$  is numerically unstable for large  $n$ ; practical implementations use Miller’s backward recurrence algorithm. To avoid overflow, scaled variants  $b_n(x) = e^{-x} i_n(x)$  and  $a_n(x) = e^x k_n(x)$  are employed, with  $a_n(x)$  reducing to a polynomial in  $1/x$ .

While less common than GTOs in production codes due to computational cost, STOs remain important for:

- High-accuracy atomic and small-molecule calculations
- Pedagogical implementations demonstrating exact solutions (e.g., hydrogen atom)
- Benchmark comparisons with GTO results
- Explicitly correlated methods requiring accurate short-range behavior

The recurrence relations for modified spherical Bessel functions exemplify the diversity of quantum chemistry recurrences: unlike Hermite coefficients (multi-index, symmetric), Bessel recurrences are single-index with critical stability considerations. The DSL framework presented in Section 3 handles both cases uniformly.

### 2.3 Rys Quadrature and the Boys Function

The Boys function  $F_n(T) = \int_0^1 t^{2n} e^{-Tt^2} dt$  is fundamental to Gaussian integral evaluation, appearing in the denominator of Coulomb integrals. For small  $T$ , series expansion converges rapidly:

$$F_n(T) = \frac{1}{2n+1} - \frac{T}{2n+3} + \frac{T^2}{2(2n+5)} - \dots \quad (8)$$

For large  $T$ , asymptotic expansions or downward recurrence from  $F_0(T) = \sqrt{\pi/T} \operatorname{erf}(\sqrt{T})/2$  are used:

$$F_n(T) = \frac{(2n-1)F_{n-1}(T) - e^{-T}}{2T}. \quad (9)$$

**Rys quadrature** [14, 15] provides an alternative: express the Boys function as a Gaussian quadrature over scaled Chebyshev nodes. The two-electron repulsion integral  $(ab|cd)$  reduces to a sum over quadrature points  $t_i$  and weights  $w_i$ :

$$(ab|cd) = \sum_{i=1}^{n_{\text{roots}}} w_i \prod_{\alpha \in \{x,y,z\}} E_{\alpha}(t_i), \quad (10)$$

where the Hermite expansion coefficients  $E_{\alpha}(t)$  satisfy *three-term recurrences* in the Rys parameter  $t$ . The quadrature roots and weights themselves are computed via recurrence relations for orthogonal polynomials

(Golub-Welsch algorithm). This approach unifies integral evaluation with classical numerical analysis: Boys function  $\rightarrow$  orthogonal polynomial zeros  $\rightarrow$  Hermite expansion  $\rightarrow$  final integral.

**Clenshaw-Curtis quadrature** [16] for the Boys function approximates  $F_n(T)$  by expanding the integrand in Chebyshev polynomials and using Clenshaw’s recurrence algorithm for efficient evaluation. The Chebyshev coefficients  $c_k$  satisfy three-term recurrences, and the final summation uses Clenshaw’s algorithm:

$$f(x) = \sum_{k=0}^N c_k T_k(x) \quad \Rightarrow \quad y_{k-1} = 2xy_k - y_{k+1} + c_k, \quad (11)$$

with  $y_N = y_{N+1} = 0$ . This approach provides spectral accuracy for smooth functions and is particularly effective for the Boys function in the regime  $0.1 < T < 50$  where both series and asymptotic expansions converge slowly.

## 2.4 Orthogonal Polynomials and Quadrature

Gaussian quadrature for general weight functions  $w(x)$  relies on the zeros of orthogonal polynomials  $\{P_n(x)\}$  satisfying three-term recurrence relations:

$$P_n(x) = (A_n x + B_n)P_{n-1}(x) - C_n P_{n-2}(x). \quad (12)$$

Classical examples include Legendre ( $w = 1$ ), Chebyshev ( $w = 1/\sqrt{1-x^2}$ ), Hermite ( $w = e^{-x^2}$ ), and Laguerre ( $w = x^\alpha e^{-x}$ ) polynomials. The **Golub-Welsch algorithm** [17, 18] constructs quadrature nodes and weights by:

1. Building the tridiagonal Jacobi matrix  $J$  from recurrence coefficients  $A_n, B_n, C_n$
2. Computing eigenvalues  $\lambda_i$  (quadrature nodes) and eigenvectors  $v_i$
3. Extracting weights  $w_i = \mu_0 (v_i^{(1)})^2$ , where  $\mu_0 = \int w(x) dx$

This unifies quadrature generation across all orthogonal polynomial families through a single eigenvalue problem.

**Applications beyond quantum chemistry.** Spectral methods for partial differential equations (PDEs) expand solutions in Chebyshev or Legendre bases, with derivative operators represented as recurrence-generated matrices. Fast spherical harmonic transforms use recurrence relations for associated Legendre polynomials  $P_l^m(\cos \theta)$ . Computational special function libraries (e.g., Boost.Math, GSL) implement hypergeometric functions  ${}_2F_1(a, b; c; z)$  via recurrences in their parameters. Our DSL targets this broader ecosystem: any recurrence relation in Abramowitz & Stegun [1] or the NIST Digital Library of Mathematical Functions [2] can be specified declaratively and compiled to optimized C++ with SFINAE-based dead code elimination.

## 2.5 Mathematical Structure of Recurrence Relations

Recurrence relations exhibit diverse mathematical structures that impact code generation strategies:

**Linear vs. nonlinear.** Most quantum chemistry recurrences are linear (Hermite coefficients, Boys function, orthogonal polynomials), enabling compile-time unrolling. Nonlinear recurrences (e.g., continued fractions for special functions) require iterative solvers with convergence checks, better suited to runtime evaluation.

**Single-index vs. multi-index.** Hermite coefficients  $E_t^{i,j}$  have three indices ( $i, j, t$ ) with complex validity domains ( $i + j \geq t$ ), while Bessel functions  $i_n(x)$  are single-index. Multi-index recurrences benefit more from SFINAE, as invalid index combinations proliferate exponentially; single-index recurrences often compile efficiently with simple bounds checks.

**Stability.** Upward recurrences for  $i_n(x)$  are unstable; downward (Miller) recurrences are stable. The DSL allows users to specify recurrence direction, and the template backend can generate both forward and backward sweeps with compile-time loop bounds.

**Symmetries.** Hermite coefficients satisfy  $E_t^{ij} = E_t^{ji}$  (exchange symmetry). Template specializations can encode symmetries via SFINAE constraints, reducing redundant computation. The DSL’s syntax supports symmetry annotations that propagate to generated code.

### 3 The SFINAE Framework for Recurrence Code Generation

#### 3.1 Motivation: From Loops to Templates

Traditional implementations of recurrence relations use runtime loops with conditional branches. Consider evaluating the Hermite expansion coefficient  $E_0^{2,1}$  via the three-term recurrence:

$$E_t^{i,j} = \frac{1}{2p} E_{t-1}^{i-1,j} + P_A E_t^{i-1,j} + (t+1) E_{t+1}^{i-1,j} \tag{13}$$

A naive loop-based implementation must:

1. Check validity constraints at runtime ( $i \geq 0, j \geq 0, i + j \geq t$ )
2. Branch on index values to select the appropriate recurrence direction
3. Store intermediate results in arrays (heap allocation)
4. Iterate from base cases up to the desired indices

Each of these steps incurs runtime overhead: conditional branching disrupts instruction pipelines, array indexing prevents register allocation, and function calls inhibit inlining. More critically, the compiler cannot optimize across iterations because it does not know which indices will be needed.

**Key insight:** In quantum chemistry integral evaluation, the angular momentum values ( $L_A, L_B$ ) are compile-time constants determined by the basis set. A water molecule calculation with 6-31G basis (maximum  $L = 1$ ) will *never* need  $E_2^{5,3}$  coefficients. Yet the loop-based implementation pays the cost of checking this at runtime billions of times per SCF iteration.

Template metaprogramming shifts this cost to compile time. If the compiler knows  $i = 2, j = 1, t = 0$  when generating machine code, it can:

- Inline the entire recursion tree into a sequence of arithmetic operations
- Eliminate all validity checks (invalid combinations never instantiated)
- Allocate all intermediate values to CPU registers
- Apply aggressive instruction-level optimizations (reordering, SIMD)

The tradeoff is compilation time: generating code for all angular momentum combinations up to  $L = 4$  takes hours. However, once compiled, the resulting binary evaluates recurrences in constant time with zero branching overhead.

#### 3.2 DSL Architecture: Three Complementary Code Generation Backends

**Critical context:** The domain-specific language (DSL) presented in this section serves as the **universal recurrence solver** for the entire McMD codebase. There is no hand-coded recurrence evaluation anywhere in the system—every recurrence relation (Hermite coefficients, McMurchie-Davidson integrals, Rys quadrature, auxiliary recursions) is generated automatically by the DSL from declarative specifications.

The DSL supports **three complementary code generation backends**:

1. **Template backend (this section):** Generates SFINAE-constrained C++ template specializations evaluated at compile time. The compiler instantiates templates for all angular momentum combinations up to `L_MAX`, producing zero-overhead code with no runtime branching. The resulting binary contains specialized code for every possible shell quartet combination, which can grow large (several MB) and exceed instruction cache capacity. This approach is optimal when the *same shell quartets are evaluated repeatedly*, keeping the working set in cache.

2. **LayeredCodegen backend (Section 5.5):** Generates layer-by-layer evaluation code with systematic architectural optimizations: output parameters for zero-copy semantics, forced inlining via `RECURSUM_FORCEINLINE`, and exact-sized stack buffers. Achieves  $9.8\times$  speedup over hand-written implementations and  $1.9\times$  over traditional template metaprogramming through automatic application of patterns that are tedious to implement manually.
3. **Runtime backend (Section 5):** Generates traditional loop-based C++ code with runtime evaluation. The compiler produces a single compact code path that evaluates recurrences dynamically based on input parameters. The smaller binary size (typically  $<100$  KB) fits entirely in L1 instruction cache. This approach is optimal when *frequently switching between different shell quartet types*, avoiding instruction cache misses at the cost of branch mispredictions.

Both backends start from the *same* DSL specification (5–20 lines of Python). The user chooses the backend based on workload characteristics, not algorithmic differences. Section 5 presents comprehensive benchmarks comparing both strategies.

**This section focuses exclusively on the template backend**, demonstrating how SFINAE enables compile-time dead code elimination, automatic validity checking, and full recurrence unrolling. The techniques apply uniformly across all 17 recurrence types implemented in the codebase.

### 3.3 SFINAE: Substitution Failure Is Not An Error

The C++ template system provides a mechanism called **SFINAE** that enables compile-time selection among multiple function or class template specializations. The name derives from the principle: when the compiler attempts to instantiate a template with specific arguments, and that instantiation would be ill-formed (e.g., due to type mismatches or constraint violations), the instantiation is simply removed from the candidate set rather than causing a compilation error.

For recurrence relations, SFINAE allows us to write multiple template specializations, each valid for different index ranges, and let the compiler automatically select the correct one based on the indices provided.

#### 3.3.1 SFINAE by Example

Consider a simple case: we want  $E_0^{0,0} = 1$  (base case) but  $E_t^{i,j} = 0$  when  $i + j < t$  (invalid indices). Using SFINAE:

Listing 1: SFINAE for base case and invalid indices

```

1 // Primary template: matches when no specialization applies
2 template<int nA, int nB, int N, typename Enable = void>
3 struct HermiteCoeff {
4     static double compute(...) {
5         return 0.0; // Invalid indices return 0
6     }
7 };
8
9 // Explicit specialization for base case
10 template<>
11 struct HermiteCoeff<0, 0, 0, void> {
12     static double compute(...) {
13         return 1.0; // E^{0,0}_0 = 1
14     }
15 };
16
17 // Partial specialization with SFINAE constraint
18 template<int nA, int nB, int N>
19 struct HermiteCoeff<

```

```

20     nA, nB, N,
21     typename std::enable_if<(nA >= 0) && (nB >= 0) && (nA + nB >= N)>::type
22 > {
23     static double compute(double PA, double PB, double aAB) {
24         // Recurrence formula here...
25     }
26 };

```

### How it works:

1. When the compiler sees `HermiteCoeff<2,1,0>::compute(...)`, it searches for a matching specialization.
2. It tries the explicit specialization `HermiteCoeff<0,0,0>` — indices don't match, skip.
3. It tries the partial specialization with `std::enable_if`:
  - Substitute `nA=2, nB=1, N=0`
  - Check constraint:  $(2 \geq 0) \wedge (1 \geq 0) \wedge (2 + 1 \geq 0) \rightarrow \text{true}$
  - `std::enable_if<true>::type`  $\rightarrow$  void (valid type)
  - This specialization matches!
4. If the constraint were false, `std::enable_if<false>` would have no `::type` member, causing a substitution failure. The specialization would be silently removed from consideration, and the primary template would match instead, returning 0.

This mechanism enables automatic dead code elimination: invalid index combinations are pruned at compile time without any runtime checks.

## 3.4 DSL Design Principles

Manual implementation of template metaprogramming for recurrence relations is tedious and error-prone. Each recurrence type requires:

- Identifying all distinct cases (base cases, boundary conditions, general recurrences)
- Encoding validity constraints as SFINAE expressions
- Ensuring consistent ordering (more specific templates before general ones)
- Debugging cryptic template instantiation errors

Our domain-specific language (DSL) automates this process through a declarative, high-level interface. The design philosophy follows three principles:

**Declarative over Imperative** Users specify *what* the recurrence is, not *how* to evaluate it. The DSL describes mathematical structure:

$$E_t^{i,j} = \alpha E_{t-1}^{i-1,j} + \beta E_t^{i-1,j} + (t+1) E_{t+1}^{i-1,j} \quad (14)$$

rather than implementation details (template syntax, SFINAE constraints, instantiation order).

**Separation of Concerns** The DSL cleanly separates three aspects:

1. **Structure:** Index names, runtime parameters, validity domains
2. **Rules:** Recurrence formulas, base cases, constraints
3. **Optimization:** Branch averaging, scaling factors, numerical stability

This modularity allows domain scientists to focus on mathematical correctness while the code generator handles low-level optimizations.

**Syntax Familiarity** The DSL borrows notation from NumPy's einsum for index operations ( $E[i-1, j, t+1]$ ) and uses Python's natural expression syntax. A quantum chemist familiar with Python can write DSL specifications without learning C++ template metaprogramming.

## 3.5 DSL Syntax and Semantics

### 3.5.1 Core Components

A recurrence specification consists of four parts:

#### 1. Signature

```
1 rec = Recurrence(  
2     name="Hermite",           # Generates struct HermiteCoeff  
3     indices=["nA", "nB", "N"], # Template parameters (compile-time)  
4     runtime_vars=["PA", "PB", "aAB"], # Function arguments (runtime)  
5     vec_type="Vec8d"         # SIMD vector type (8-way double precision)  
6 )
```

This generates a C++ template with signature:

```
1 template<int nA, int nB, int N>  
2 struct HermiteCoeff {  
3     static Vec8d compute(Vec8d PA, Vec8d PB, Vec8d aAB);  
4 };
```

#### 2. Validity Constraints

```
1 rec.validity("nA >= 0", "nB >= 0", "N >= 0", "nA + nB >= N")
```

These constraints define the *mathematical domain* of the recurrence. Any index combination violating these constraints yields zero. The code generator compiles this to:

```
1 typename std::enable_if<(nA >= 0) && (nB >= 0) && (N >= 0)  
2     && (nA + nB >= N)>::type
```

#### 3. Base Cases

```
1 rec.base(nA=0, nB=0, N=0, value=1.0)
```

Base cases are explicit template specializations:

```
1 template<>  
2 struct HermiteCoeff<0, 0, 0, void> {  
3     static Vec8d compute(...) { return Vec8d(1.0); }  
4 };
```

Values can be runtime variables (`value="x"`) or numeric constants.

## 4. Recurrence Rules

```
1 rec.rule(  
2     constraints="nA > 0 && nB == 0",  
3     expression="aAB * E[nA-1, nB, N-1] + PA * E[nA-1, nB, N] + (N+1) * E[nA-1, nB, N+1]"  
4 )
```

Rules specify when a particular recurrence formula applies. The `expression` uses einsum-like notation:

- `E[nA-1, nB, N+1]` denotes a recursive call with shifted indices
- Runtime variables (`PA`, `aAB`) appear directly
- Index-dependent coefficients use parentheses: `(N+1)`, `(2*nA-1)`

### 3.5.2 Expression Parsing and AST Construction

The DSL parser transforms string expressions into an abstract syntax tree (AST). Consider:

```
1 "aAB * E[nA-1, nB, N-1] + PA * E[nA-1, nB, N]"
```

Parsing stages:

1. **Tokenization:** Split on `+` at depth 0 (respecting brackets):

```
["aAB * E[nA-1, nB, N-1]", "PA * E[nA-1, nB, N]"]
```

2. **Term analysis:** Each term matches pattern `coefficient * E[...]`:

- Term 1: coefficient `aAB`, shifts `{nA: -1, nB: 0, N: -1}`
- Term 2: coefficient `PA`, shifts `{nA: -1, nB: 0, N: 0}`

3. **Coefficient classification:**

- `aAB`  $\in$  `runtime_vars`  $\rightarrow$  `Var("aAB")`
- `(2*nA-1)` contains `nA`  $\in$  `indices`  $\rightarrow$  `IndexExpr("2*nA-1")`
- `0.5` is numeric  $\rightarrow$  `Const(0.5)`

4. **AST construction:**

```
1 Sum(  
2     Term(Var("aAB"), RecursiveCall({nA: -1, nB: 0, N: -1})),  
3     Term(Var("PA"), RecursiveCall({nA: -1, nB: 0, N: 0}))  
4 ])
```

This AST representation enables the code generator to emit optimized C++ without string manipulation.

### 3.5.3 Advanced Features

#### Branch Averaging for Numerical Stability

When a recurrence can proceed via multiple equivalent paths (e.g., reducing  $i$  or  $j$  in  $E_t^{i,j}$  with  $i, j > 0$ ), computing both branches and averaging improves consistency. The DSL provides:

```

1 rec.branch_average(
2     constraints="nA > 0 && nB > 0",
3     branches=[
4         "aAB * E[nA, nB-1, N-1] + PB * E[nA, nB-1, N]", # B-side
5         "aAB * E[nA-1, nB, N-1] + PA * E[nA-1, nB, N]" # A-side
6     ]
7 )

```

Generated code evaluates both and averages:

```

1 Vec8d branchA = aAB * HermiteCoeff<nA, nB-1, N-1>::compute(...) + ...;
2 Vec8d branchB = aAB * HermiteCoeff<nA-1, nB, N-1>::compute(...) + ...;
3 return 0.5 * (branchA + branchB);

```

This provides built-in consistency checking at compile time with zero runtime cost.

### Scaled Recurrences

Some recurrences involve division, e.g., Legendre polynomials:

$$P_n = \frac{(2n-1)xP_{n-1} - (n-1)P_{n-2}}{n} \quad (15)$$

The DSL supports scaling factors:

```

1 rec.rule(
2     "n > 1",
3     "(2*n-1) * x * E[n-1] + -(n-1) * E[n-2]",
4     scale="1/n"
5 )

```

The code generator emits:

```

1 return ((2*n-1) * x * LegendreCoeff<n-1>::compute(x)
2         - (n-1) * LegendreCoeff<n-2>::compute(x)) / Vec8d(n);

```

## 3.6 Code Generation Architecture

### 3.6.1 From AST to C++ Templates

The code generator (CppGenerator class) traverses the AST and emits C++ template specializations. The process follows a fixed structure:

#### 1. Header and Primary Template

```

1 #pragma once
2 #include <type_traits>
3 #include <vectorclass.h>
4
5 namespace hermite {
6

```

```

7  template<int nA, int nB, int N, typename Enable = void>
8  struct HermiteCoeff {
9      static Vec8d compute(Vec8d /*PA*/, Vec8d /*PB*/, Vec8d /*aAB*/) {
10         return Vec8d(0.0); // Primary template: invalid indices
11     }
12 };

```

The primary template serves as the fallback when no specialization matches. It returns zero, implementing the validity constraint automatically.

## 2. Base Case Specializations

For each base case:

```

1  template<>
2  struct HermiteCoeff<0, 0, 0, void> {
3      static Vec8d compute(Vec8d /*PA*/, Vec8d /*PB*/, Vec8d /*aAB*/) {
4          return Vec8d(1.0);
5      }
6  };

```

Unused runtime parameters are commented out (denoted by `/*...*/`) to avoid compiler warnings.

## 3. Rule Specializations with SFINAE

For each recurrence rule, generate a partial specialization:

```

1  template<int nA, int nB, int N>
2  struct HermiteCoeff<
3      nA, nB, N,
4      typename std::enable_if<
5          (nA > 0) && (nB == 0)           // Rule constraint
6          && (nA >= 0) && (nB >= 0)       // Validity constraints
7          && (N >= 0) && (nA + nB >= N)
8      >::type
9  > {
10     static Vec8d compute(Vec8d PA, Vec8d PB, Vec8d aAB) {
11         // Body from AST traversal
12         return aAB * HermiteCoeff<nA-1, nB, N-1>::compute(PA, PB, aAB)
13             + PA * HermiteCoeff<nA-1, nB, N >::compute(PA, PB, aAB)
14             + Vec8d(N+1) * HermiteCoeff<nA-1, nB, N+1>::compute(PA, PB, aAB);
15     }
16 };

```

### Key points:

- SFINAE constraints combine rule-specific conditions with global validity
- Index shifts in recursive calls are compile-time arithmetic:  $nA-1$ ,  $N+1$
- Runtime coefficients (PA, aAB) are inlined as template arguments
- Index-dependent coefficients ( $\text{Vec8d}(N+1)$ ) are computed at compile time

## 4. Body Generation for Complex Expressions

When expressions involve many terms (e.g., branch averaging), the generator uses temporary variables for clarity:

```

1 static Vec8d compute(Vec8d PA, Vec8d PB, Vec8d aAB) {
2     // Branch A: reduce via B-side
3     Vec8d a1 = aAB * HermiteCoeff<nA, nB-1, N-1>::compute(PA, PB, aAB);
4     Vec8d a2 = PB * HermiteCoeff<nA, nB-1, N >::compute(PA, PB, aAB);
5     Vec8d a3 = Vec8d(N+1) * HermiteCoeff<nA, nB-1, N+1>::compute(PA, PB, aAB);
6
7     // Branch B: reduce via A-side
8     Vec8d b1 = aAB * HermiteCoeff<nA-1, nB, N-1>::compute(PA, PB, aAB);
9     Vec8d b2 = PA * HermiteCoeff<nA-1, nB, N >::compute(PA, PB, aAB);
10    Vec8d b3 = Vec8d(N+1) * HermiteCoeff<nA-1, nB, N+1>::compute(PA, PB, aAB);
11
12    // Average
13    return (a1 + a2 + a3 + b1 + b2 + b3) * Vec8d(0.5);
14 }

```

This maintains readability while allowing the compiler to optimize freely (common subexpression elimination, instruction reordering).

### 3.6.2 Template Instantiation Priority

C++ resolves template specializations by *most specific match*. The DSL must order rules to ensure correct selection. Priority rules:

1. **Explicit specializations** (base cases) always take precedence
2. Among partial specializations, more **constrained** templates match first
3. Templates with **equality constraints** are more specific than inequalities

Example ordering for Hermite coefficients:

```

1 // Priority 1: Explicit base case
2 template<> struct HermiteCoeff<0, 0, 0, void> { ... };
3
4 // Priority 2: nA == 0 && nB > 0 (two equality constraints)
5 template<int nB, int N>
6 struct HermiteCoeff<0, nB, N, std::enable_if<...>::type> { ... };
7
8 // Priority 3: nA > 0 && nB == 0 (two equality constraints)
9 template<int nA, int N>
10 struct HermiteCoeff<nA, 0, N, std::enable_if<...>::type> { ... };
11
12 // Priority 4: nA > 0 && nB > 0 (inequality only, least specific)
13 template<int nA, int nB, int N>
14 struct HermiteCoeff<nA, nB, N, std::enable_if<...>::type> { ... };

```

The DSL's `priority_key()` function sorts rules by:

```

1 def priority_key(self):
2     eq_count = sum(1 for c in constraints if c.op == ConstraintOp.EQ)
3     return (-eq_count, -len(constraints)) # More specific first

```

## 3.7 Compile-Time Evaluation and Optimization

### 3.7.1 Template Instantiation Tree

Consider evaluating `HermiteCoeff<2,1,0>::compute(PA, PB, aAB)`. The compiler generates an instantiation tree:

The instantiation proceeds as follows:

```
E[2,1,0]
+-- Branch A: E[2,0,0]
|   +-- E[1,0,-1] -> invalid (N < 0) -> 0
|   +-- E[1,0,0]
|       |   +-- E[0,0,-1] -> invalid -> 0
|       |   +-- E[0,0,0] -> base case -> 1.0
|       |   +-- E[0,0,1] -> invalid (nA+nB < N) -> 0
|       +-- E[1,0,1]
|           +-- E[0,0,0] -> base case -> 1.0
|           +-- E[0,0,1] -> invalid -> 0
|           +-- E[0,0,2] -> invalid -> 0
+-- Branch B: E[1,1,0]
    +-- ... (similar structure)
```

Each node is a template instantiation. The compiler:

1. Instantiates `HermiteCoeff<2,1,0>`
2. Matches the “`nA > 0 && nB > 0`” rule (branch averaging)
3. Instantiates dependencies:  
`HermiteCoeff<2,0,0>`, `HermiteCoeff<1,1,0>`
4. Recurses until reaching base cases or invalid indices
5. Prunes invalid branches (primary template returns 0)
6. Inlines all function calls into a single expression

**Result:** The final machine code contains ~40–50 arithmetic instructions with no conditionals, loops, or function calls. All intermediate values reside in registers.

### 3.7.2 Dead Code Elimination via SFINAE

Invalid recurrence calls (`E[i,j,t]` with  $i + j < t$  or negative indices) are eliminated *before* code generation. When the compiler attempts:

```
1 HermiteCoeff<1, 0, -1>::compute(...) // N = -1 < 0
```

The SFINAE check fails (`N >= 0` is false), so no specialized template matches. The primary template (which returns 0) is instantiated instead. Critically, the primary template’s body is *trivial*—it does not recursively call itself. This prevents infinite template instantiation.

The compiler then performs constant propagation:

```
1 Vec8d result = PA * HermiteCoeff<1,0,-1>::compute(...);
2 // Becomes:
3 Vec8d result = PA * Vec8d(0.0);
4 // Optimized to:
5 Vec8d result = Vec8d(0.0);
```

Dead code elimination removes these zero contributions entirely.

The SFINAE constraint resolution process shows how invalid indices are handled at compile time: the SFINAE constraint failure causes the compiler to select the primary template (returning 0.0) without error. This provides a key performance advantage: runtime code requires branches to check index validity, while template code has zero branches—all validity checks are resolved during compilation.

### 3.7.3 SIMD Vectorization Preservation

All operations use `Vec8d` (8-way SIMD double precision vectors from Agner Fog’s VCL library). Template metaprogramming preserves vectorization because:

- No array indexing (all values in registers or on stack)
- No control flow (templates selected at compile time)
- Arithmetic operations map directly to SIMD instructions

A typical evaluation:

```
1 Vec8d PA(pa_values); // Load 8 shell pairs
2 Vec8d E = HermiteCoeff<2,1,0>::compute(PA, PB, aAB);
```

compiles to vector instructions (AVX2/AVX-512):

```
vmulpd %ymm1, %ymm2, %ymm3 ; PA * E[1,1,0]
vaddpd %ymm3, %ymm4, %ymm5 ; accumulate
...
```

Eight recurrence evaluations execute in parallel using the same instruction sequence.

## 3.8 Workflow Summary

The complete pipeline from DSL specification to optimized binary proceeds as follows:

1. **DSL Input:** User writes declarative recurrence specification (5–20 lines of Python)
2. **Parser:** Regex-based parser builds AST from expression strings
3. **Backend Selection:** User chooses template backend or runtime backend
4. **Code Generator (Template Backend):** AST traversal emits C++ template header with SFINAE constraints (100–500 lines)
5. **Code Generator (Runtime Backend):** AST traversal emits loop-based C++ implementation (50–200 lines)
6. **C++ Compiler:** Standard C++17 compiler instantiates templates (template backend) or compiles loops (runtime backend)
7. **Optimized Binary:** Fully vectorized code optimized for workload characteristics

#### Performance characteristics (template backend, this section):

- **DSL execution:** <1 second to generate header
- **C++ compilation:** 30 seconds (`L_MAX=2`) to 2 hours (`L_MAX=4`)
- **Runtime evaluation:** 1–10 CPU cycles per coefficient (register-only)
- **Code size:** ~10KB per angular momentum level

#### Performance characteristics (runtime backend, Section 5):

- **DSL execution:** <1 second to generate implementation
- **C++ compilation:** 5–10 seconds (independent of `L_MAX`)
- **Runtime evaluation:** 10–50 CPU cycles per coefficient (cache-friendly loops)
- **Code size:** ~2KB (single code path)

Both backends are generated from the *same* DSL specification. The compile-time cost is paid once; runtime performance is competitive with expert hand-optimized code while maintaining mathematical clarity and correctness through the DSL abstraction.

## 3.9 Comparison with Existing Approaches

### 3.9.1 libint2 Symbolic Code Generation

The libint2 library [4] uses a custom C++ code generator (the "libint compiler") to derive recurrence relations and generate optimized C++ code for integral evaluation. A related symbolic code generation approach was pioneered for GPU-accelerated quantum chemistry integrals in the TeraChem software [19, 20, 21], which employs a "meta-programming" strategy leveraging computer algebra systems for equation derivation and code generation [22]. This approach has been further developed and validated for f-orbital integrals by Wang et al. [23], demonstrating that automated code generation with common subexpression elimination can produce competitive GPU implementations for quantum chemistry integrals. Advantages: aggressive optimization, handles complex derivative recurrences, reduces manual coding errors. Disadvantages: requires specialized code generation infrastructure, generated code can be difficult to debug, long compile times for high angular momentum.

Our DSL approach offers a middle ground: less aggressive symbolic optimization than libint2, but faster code generation and easier integration into existing codebases. The DSL does not require SymPy or Mathematica—only standard Python 3.7+.

### 3.9.2 DSL Runtime Backend

The DSL also generates runtime loop-based code (the "runtime backend" mentioned in Section 3.2). This is *not* hand-coded—it is automatically produced from the same DSL specification as the template backend. The runtime backend trades compile-time specialization overhead for a compact binary that fits in instruction cache.

Benchmark comparisons (Section 5) show that **workload characteristics determine optimal backend choice**:

- **Repeated evaluation of same shell quartets (cache-hot)**: DSL template backend achieves 3–25× speedup over DSL runtime backend due to zero-overhead specialization
- **Frequent switching between different shell quartets (cache-cold)**: DSL runtime backend achieves 1.2–1.3× speedup over DSL template backend by avoiding instruction cache misses from large binary size

Both backends are DSL-generated—no manual loop coding required. The choice is a performance tuning decision, not an algorithmic difference.

### 3.9.3 Manual Template Metaprogramming

Expert C++ programmers can manually write template metaprogramming code similar to what the DSL generates. This requires deep knowledge of template syntax, SFINAE, and instantiation rules. The DSL democratizes this approach: domain scientists specify mathematics, the generator handles C++ complexity. Additionally, the DSL ensures consistency: all 17 recurrence types use identical patterns, reducing maintenance burden and potential for bugs.

## 4 Recurrence Relations in Computational Science

This section demonstrates the DSL framework on representative recurrence relations spanning quantum chemistry and numerical analysis. We focus on three classes: (1) multi-index Gaussian integral recurrences (McMurchie-Davidson, Rys quadrature), (2) single-index special functions (modified spherical Bessel functions, Boys function), and (3) orthogonal polynomials (Legendre, Chebyshev, Hermite, Laguerre). Each

case study illustrates different aspects of the DSL’s capability: multi-index validity constraints, numerical stability considerations, and connections to classical numerical methods.

## 4.1 Hermite Expansion Coefficients (McMurchie-Davidson)

The McMurchie-Davidson (McMD) method evaluates Gaussian integrals by expanding products of Gaussian functions into Hermite Gaussians centered at intermediate points. The core of this approach is the computation of Hermite expansion coefficients  $E_t^{i,j}$  via three-term recurrences.

### 4.1.1 Mathematical Foundation

A Cartesian Gaussian primitive centered at  $\mathbf{A}$  with angular momentum  $(i_x, i_y, i_z)$  and exponent  $\alpha$  is:

$$g_{i_x i_y i_z}(\mathbf{r}; \mathbf{A}, \alpha) = (x - A_x)^{i_x} (y - A_y)^{i_y} (z - A_z)^{i_z} e^{-\alpha |\mathbf{r} - \mathbf{A}|^2}. \quad (16)$$

The product of two Gaussians centered at  $\mathbf{A}$  and  $\mathbf{B}$  can be expressed as a linear combination of Hermite Gaussians centered at the weighted midpoint  $\mathbf{P} = (\alpha \mathbf{A} + \beta \mathbf{B}) / (\alpha + \beta)$ :

$$g_i(\mathbf{r}; \mathbf{A}, \alpha) g_j(\mathbf{r}; \mathbf{B}, \beta) = \sum_{t=0}^{i+j} E_t^{i,j} H_t(\mathbf{r}; \mathbf{P}, p) e^{-\mu |\mathbf{A} - \mathbf{B}|^2}, \quad (17)$$

where  $p = \alpha + \beta$ ,  $\mu = \alpha\beta/p$ , and  $H_t$  are Hermite Gaussians.

### 4.1.2 Recurrence Relations

The Hermite coefficients satisfy three-term recurrences (one per Cartesian direction; we show the  $x$ -component):

$$E_t^{i,j} = \frac{1}{2p} E_{t-1}^{i-1,j} + (P_x - A_x) E_t^{i-1,j} + (t+1) E_{t+1}^{i-1,j}, \quad i > 0, \quad (18)$$

$$E_t^{i,j} = \frac{1}{2p} E_{t-1}^{i,j-1} + (P_x - B_x) E_t^{i,j-1} + (t+1) E_{t+1}^{i,j-1}, \quad j > 0, \quad (19)$$

with base cases  $E_0^{0,0} = 1$  and  $E_t^{i,j} = 0$  when  $i + j < t$  or  $t < 0$ .

### 4.1.3 DSL Specification

The DSL captures these recurrences in 15 lines of Python:

Listing 2: DSL specification for Hermite coefficients (x-component)

```

1 rec = Recurrence("HermiteCoeffX", ["i", "j", "t"],
2                 ["inv_2p", "PA_x", "PB_x"],
3                 namespace="mcmd")
4 rec.validity("i >= 0 and j >= 0 and t >= 0 and i+j >= t")
5 rec.base(i=0, j=0, t=0, value="1.0")
6
7 # Recurrence in i (Eq. \ref{eq:hermite-i})
8 rec.rule("i > 0",
9         "inv_2p * E[i-1,j,t-1] + PA_x * E[i-1,j,t] + (t+1) * E[i-1,j,t+1]",
10        name="Increment i")
11
12 # Recurrence in j (Eq. \ref{eq:hermite-j})
13 rec.rule("j > 0",
14         "inv_2p * E[i,j-1,t-1] + PB_x * E[i,j-1,t] + (t+1) * E[i,j-1,t+1]",
15        name="Increment j")

```

The generator produces SFINAE-constrained template specializations that instantiate only valid  $(i, j, t)$  combinations. For example, the template for  $E_0^{2,1}$  expands into 11 intermediate coefficients, all evaluated at compile time with zero runtime branching.

#### 4.1.4 Validation

Benchmark comparisons (Section 5) show that DSL-generated Hermite coefficient code matches expert hand-coded performance within 3.3%, validating both correctness and optimization quality.

## 4.2 Application: Efficient Exchange (K) Matrix Construction

The Hermite expansion coefficients described above enable a highly efficient algorithm for constructing the quantum exchange (K) matrix—a critical bottleneck in Hartree-Fock and hybrid density functional theory calculations. The K matrix is defined as:

$$K_{\mu\nu} = \sum_{\lambda\sigma} D_{\lambda\sigma}(\mu\lambda|\nu\sigma), \quad (20)$$

where  $D_{\lambda\sigma}$  is the density matrix and  $(\mu\lambda|\nu\sigma)$  are two-electron repulsion integrals with **interleaved indices**. This index pattern prevents the simple global density contraction used for the Coulomb (J) matrix and makes K inherently more expensive.

### 4.2.1 The Challenge: Interleaved Index Pattern

Unlike the Coulomb matrix where indices pair naturally as  $(\mu\nu|\lambda\sigma)$ , the exchange term couples:

- First electron: functions  $\phi_\mu$  and  $\phi_\lambda$  (potentially on centers  $A$  and  $C$ )
- Second electron: functions  $\phi_\nu$  and  $\phi_\sigma$  (potentially on centers  $B$  and  $D$ )

Direct evaluation would require  $O(N^4)$  storage of all four-index ERIs and  $O(N^5)$  operations for contraction with the density matrix. The McMurchie-Davidson method avoids this through a two-step transformation that exploits the Hermite expansion structure.

### 4.2.2 Two-Step Pseudo-Density Transformation

The key insight is to decompose the four-center problem into two sequential two-center problems using Hermite Gaussians as intermediates:

**First Half-Transformation:** For shell pair  $(B, D)$ , contract the density matrix with Hermite coefficients to form a “pseudo-density” in the Hermite basis:

$$X_u^{BD} = \sum_{\nu \in B} \sum_{\sigma \in D} D_{\nu\sigma} E_u^{BD}[\nu, \sigma] (-1)^{|u|}, \quad (21)$$

where  $u = (u_x, u_y, u_z)$  is a Hermite multi-index and  $|u| = u_x + u_y + u_z$ .

**Exchange Interaction:** Couple the pseudo-density with the Hermite representation of shell pair  $(A, C)$  through Coulomb auxiliary integrals  $R_{t+u}^{(0)}(\mathbf{P}_{AC}, \mathbf{Q}_{BD})$ :

$$V_t^{AC} = \sum_{B,D} \sum_u X_u^{BD} R_{t+u}^{(0)}(\mathbf{P}_{AC}, \mathbf{Q}_{BD}), \quad (22)$$

where  $\mathbf{P}_{AC}$  and  $\mathbf{Q}_{BD}$  are the Hermite Gaussian centers for pairs  $(A, C)$  and  $(B, D)$  respectively.

**Second Half-Transformation:** Contract the exchange potential back to the atomic orbital basis:

$$K_{\mu\lambda} = \sum_t E_t^{AC}[\mu, \lambda] V_t^{AC}. \quad (23)$$

### 4.2.3 Complete Algorithm

The full K-matrix build algorithm proceeds as:

---

**Algorithm 1:** Exchange (K) Matrix Construction via McMurchie-Davidson

---

**Input:** Density matrix  $D$ , basis set shells, Schwarz bounds  $Q_{AB}$ **Output:** Exchange matrix  $K$ 

```
1 foreach shell  $A$  do
2   foreach shell  $C$  do
3     Compute Hermite center  $\mathbf{P}_{AC}$  and coefficients  $E_t^{AC}$ ;
4     Initialize exchange potential:  $V_t^{AC} \leftarrow 0$  for all Hermite indices  $t$ ;
5     foreach shell  $B$  do
6       foreach shell  $D$  do
7         if  $Q_{AC} \times Q_{BD} < \epsilon_{\text{Schwarz}}$  then
8           skip ; // Schwarz screening
9         Compute Hermite center  $\mathbf{Q}_{BD}$  and coefficients  $E_u^{BD}$ ;
10        // First half-transformation: density to Hermite basis
11        foreach Hermite index  $u$  do
12           $X_u^{BD} \leftarrow 0$ ;
13          phase  $\leftarrow (-1)^{u_x+u_y+u_z}$ ;
14          foreach  $\nu \in B, \sigma \in D$  do
15             $X_u^{BD} \leftarrow X_u^{BD} + D_{\nu\sigma} \cdot E_u^{BD}[\nu, \sigma] \cdot \text{phase}$ ;
16          Compute Coulomb auxiliary integrals  $R_{t+u}^{(0)}(\mathbf{P}_{AC}, \mathbf{Q}_{BD})$ ;
17          // Accumulate exchange interaction
18          foreach Hermite index  $t$  do
19            foreach Hermite index  $u$  do
20               $V_t^{AC} \leftarrow V_t^{AC} + X_u^{BD} \cdot R_{t+u}^{(0)}$ ;
21        // Second half-transformation: Hermite basis to AO basis
22        foreach  $\mu \in A, \lambda \in C$  do
23           $K_{\mu\lambda} \leftarrow \sum_t E_t^{AC}[\mu, \lambda] \cdot V_t^{AC}$ ;
```

---

#### 4.2.4 Complexity Reduction and Performance

This algorithm achieves several critical optimizations:

1. **Storage reduction:**  $O(N^4) \rightarrow O(L^4)$  where  $L$  is maximum angular momentum (typically  $L \leq 4$ )
2. **Reuse of Hermite coefficients:** Each  $E_t^{AC}$  set is computed once and reused across all  $(B, D)$  pairs
3. **Cache locality:** The inner loops access contiguous Hermite arrays, maximizing vectorization and cache hits
4. **Aggressive screening:** Schwarz and distance-based screening can eliminate  $>90\%$  of shell quartets for large systems

Benchmarks (Section 5) demonstrate that this algorithm, when implemented with DSL-generated template code for the Hermite coefficient evaluation, achieves 3–25 $\times$  speedup over alternative approaches. The speedup comes from:

- **SFINAE dead-code elimination:** Only valid  $(i, j, t)$  combinations are compiled, reducing code size by  $\sim 60\%$
- **Compile-time loop unrolling:** Inner Hermite summations unroll completely
- **Specialized index calculations:** Custom code for each  $(A, C)$  angular momentum pair
- **Register allocation:** All Hermite intermediates fit in CPU registers for low  $L$

The two-step transformation structure also enables efficient gradient evaluation, where derivatives propagate through the same Hermite intermediate representation.

### 4.3 Rys Quadrature: Numerical Integration Approach

Rys quadrature provides an alternative to McMurchie-Davidson for evaluating Gaussian electron repulsion integrals (ERIs). Rather than using recurrence relations to build auxiliary coefficients, Rys transforms the four-center ERI into a one-dimensional numerical quadrature.

#### 4.3.1 Mathematical Foundation

A four-center electron repulsion integral over Gaussian primitives is:

$$(ab|cd) = \int \int g_a(\mathbf{r}_1)g_b(\mathbf{r}_1)\frac{1}{r_{12}}g_c(\mathbf{r}_2)g_d(\mathbf{r}_2)d\mathbf{r}_1d\mathbf{r}_2. \quad (24)$$

Through Gaussian product rules and Fourier transform techniques, this six-dimensional integral reduces to:

$$(ab|cd) = K_{ab}K_{cd}e^{-\mu_{AB}R_{AB}^2-\mu_{CD}R_{CD}^2} \int_0^1 t^{2n}e^{-Tt^2}F(t)dt, \quad (25)$$

where  $n = L_A + L_B + L_C + L_D$  is the total angular momentum,  $T = p_P p_Q R_{PQ}^2 / (p_P + p_Q)$  with  $p_P = \alpha + \beta$  and  $p_Q = \gamma + \delta$ , and  $F(t)$  contains polynomial factors in  $t$ .

#### 4.3.2 Rys Polynomial Roots and Weights

The integral is approximated by Gaussian quadrature:

$$\int_0^1 t^{2n}e^{-Tt^2}F(t)dt \approx \sum_{i=1}^N w_i F(t_i), \quad (26)$$

where  $N = \lceil (n+1)/2 \rceil$  is the number of quadrature points, and  $(t_i, w_i)$  are roots and weights of orthogonal polynomials (Rys polynomials) with respect to the weight function  $t^{2n}e^{-Tt^2}$ .

The roots and weights are computed via recurrence relations for orthogonal polynomials (Golub-Welsch algorithm):

1. Construct the tridiagonal Jacobi matrix  $J$  from three-term recurrence coefficients
2. Compute eigenvalues  $\lambda_i$  (quadrature roots  $t_i = \sqrt{\lambda_i}$ )
3. Compute eigenvectors to obtain weights  $w_i$

#### 4.3.3 Recurrence Structure in Rys Quadrature

Rys quadrature involves multiple nested recurrences:

- **Boys function evaluation:**  $F_m(T) = \int_0^1 t^{2m}e^{-Tt^2}dt$  satisfies the downward recurrence:

$$F_m(T) = \frac{(2m-1)F_{m-1}(T) - e^{-T}}{2T}, \quad m > 0. \quad (27)$$

- **Rys polynomial recurrence coefficients:** For each  $T$ , compute recurrence coefficients  $\alpha_k(T)$ ,  $\beta_k(T)$  via formulas involving Boys function ratios:

$$\alpha_k = \frac{F_{k+1}}{F_k}, \quad \beta_k = \frac{F_k F_{k+2} - F_{k+1}^2}{F_k^2}. \quad (28)$$

- **Hermite expansion at quadrature points:** For each root  $t_i$ , evaluate Hermite-like expansion coefficients  $E_\alpha^{(i)}(t_i)$  via recurrences in the scaled variable  $u = 2t_i^2 - 1$ .

### 4.3.4 DSL Implementation

The DSL specifies each recurrence layer independently. For the Boys function:

Listing 3: DSL specification for Boys function downward recurrence

```
1 rec = Recurrence("BoysFunction", ["m"], ["T", "exp_T", "inv_2T"],
2                 namespace="rys")
3 rec.validity("m >= 0")
4 rec.base(m=0, value="erf(sqrt(T)) * sqrt(pi / (4*T))") # F_0 analytic
5 rec.rule("m > 0",
6         "((2*m - 1) * E[m-1] - exp_T) * inv_2T",
7         name="Downward recurrence (stable)")
```

For Rys polynomial roots (simplified):

Listing 4: DSL specification for Rys root computation via Golub-Welsch

```
1 # Recurrence coefficients alpha_k, beta_k from Boys function ratios
2 rec_alpha = Recurrence("RysAlpha", ["k"], ["F"], namespace="rys")
3 rec_alpha.validity("k >= 0 and k < N_ROOTS")
4 rec_alpha.rule("k >= 0", "F[k+1] / F[k]")
5
6 # Jacobi matrix construction and eigenvalue solve (external LAPACK call)
7 # DSL generates coefficient arrays; numerical linear algebra is external
```

The Rys method demonstrates the DSL’s ability to handle **multi-layered recurrences** where one recurrence (Boys function) feeds into another (Rys polynomial coefficients), which then drives a third (Hermite expansions at quadrature points).

### 4.3.5 Performance Characteristics

Rys quadrature has fundamentally different computational characteristics than McMurchie-Davidson:

- **Runtime adaptivity:** Number of quadrature points scales as  $\lceil(L_{\text{total}} + 1)/2\rceil$ , adapting to angular momentum
- **Memory efficiency:**  $O(N_{\text{roots}})$  storage vs.  $O(L^3)$  for McMurchie-Davidson
- **Numerical robustness:** Direct evaluation of integrals avoids deep recursion trees
- **Cache behavior:** Compact code (<100 KB) fits in L1 instruction cache

In full quantum chemistry applications (SCF iterations with frequent angular momentum switching), Rys quadrature often achieves 1.2–1.3× speedup over McMurchie-Davidson templates due to superior instruction cache locality. However, this algorithmic comparison is distinct from the code generation strategy benchmarks in Section 5, which focus on different implementation approaches (LayeredCodegen, TMP, hand-written, symbolic) for the same algorithm (McMurchie-Davidson).

## 4.4 Boys Function and Auxiliary Integrals

The Boys function  $F_m(T)$  appears ubiquitously in Gaussian integral evaluation as the fundamental auxiliary integral for Coulomb potentials.

### 4.4.1 Definition and Properties

$$F_m(T) = \int_0^1 t^{2m} e^{-Tt^2} dt = \frac{1}{2} \gamma(m + 1/2, T) T^{-(m+1/2)}, \tag{29}$$

where  $\gamma(a, x)$  is the lower incomplete gamma function.

The Boys function satisfies:

- **Downward recurrence** (stable):

$$F_m(T) = \frac{(2m-1)F_{m-1}(T) - e^{-T}}{2T}, \quad m > 0. \quad (30)$$

- **Upward recurrence** (unstable for large  $T$ ):

$$F_{m+1}(T) = \frac{(2m+1)F_m(T) - e^{-T}}{2T}. \quad (31)$$

- **Series expansion** (small  $T < 30$ ):

$$F_m(T) = \frac{1}{2m+1} - \frac{T}{2m+3} + \frac{T^2}{2(2m+5)} - \dots \quad (32)$$

- **Asymptotic expansion** (large  $T > 30$ ):

$$F_m(T) \approx \frac{(2m-1)!!}{2^{m+1}} \sqrt{\frac{\pi}{T^{2m+1}}}. \quad (33)$$

#### 4.4.2 Clenshaw Algorithm Connection

For intermediate  $T$  (where both series and asymptotics converge slowly), Chebyshev polynomial expansion combined with Clenshaw's recurrence algorithm provides spectral accuracy:

$$F_m(T) = \sum_{k=0}^N c_k T_k \left( \frac{2T - (T_{\max} + T_{\min})}{T_{\max} - T_{\min}} \right), \quad (34)$$

where  $T_k$  are Chebyshev polynomials and coefficients  $c_k$  are precomputed. Evaluation uses Clenshaw's backward recurrence:

$$y_{k-1} = 2xy_k - y_{k+1} + c_k, \quad k = N, N-1, \dots, 1, \quad (35)$$

with  $y_N = y_{N+1} = 0$ , yielding  $F_m(T) = c_0/2 + xy_1 - y_2$ .

The DSL specifies Clenshaw's algorithm as a single-direction recurrence (decreasing  $k$ ), demonstrating support for backward-only evaluation patterns.

## 4.5 Modified Spherical Bessel Functions for STO Integrals

Modified spherical Bessel functions appear as auxiliary functions in all analytical methods for Slater-type orbital multi-center integrals. Unlike the multi-index Hermite coefficients, these are single-index recurrences with critical numerical stability properties.

### 4.5.1 Mathematical Definition

The modified spherical Bessel functions of the first and second kind are defined as:

$$i_n(x) = \sqrt{\frac{\pi}{2x}} I_{n+1/2}(x) = \frac{\sinh(x)}{x}, \frac{\cosh(x)}{x} - \frac{\sinh(x)}{x^2}, \dots, \quad (36)$$

$$k_n(x) = \sqrt{\frac{\pi}{2x}} K_{n+1/2}(x) \cdot \frac{2}{\pi} = \frac{\pi e^{-x}}{2x}, \frac{\pi e^{-x}}{2x} (1 + 1/x), \dots, \quad (37)$$

where base cases are  $i_0(x) = \sinh(x)/x$ ,  $i_1(x) = \cosh(x)/x - \sinh(x)/x^2$  and  $k_0(x) = (\pi/2)e^{-x}/x$ ,  $k_1(x) = k_0(x)(1 + 1/x)$ .

### 4.5.2 Recurrence Relations and Stability

Both functions satisfy three-term recurrences:

$$i_n(x) = i_{n-2}(x) - \frac{2n-1}{x}i_{n-1}(x), \quad (\text{upward, unstable}) \quad (38)$$

$$k_n(x) = k_{n-2}(x) + \frac{2n-1}{x}k_{n-1}(x). \quad (\text{upward, stable}) \quad (39)$$

The upward recurrence for  $i_n(x)$  is numerically unstable for large  $n$  due to catastrophic cancellation. Production codes use Miller’s backward recurrence: start from an asymptotic estimate at high  $n_{\max}$ , recurse downward, then normalize using the known value of  $i_0(x)$  or  $i_1(x)$ .

The recurrence for  $k_n(x)$  is stable in the upward direction and can be used directly.

### 4.5.3 Overflow-Safe Scaled Forms

To prevent overflow in intermediate calculations, scaled (reduced) Bessel functions are defined:

$$b_n(x) = e^{-x}i_n(x), \quad (40)$$

$$a_n(x) = e^xk_n(x) = \frac{\pi}{2x} \sum_{k=0}^n \frac{(n+k)!}{k!(n-k)!} (2x)^{-k}. \quad (41)$$

The exponential factors cancel in the recurrence relations, so  $b_n$  and  $a_n$  satisfy the same recurrences as their parent functions. Notably,  $a_n(x)$  is purely polynomial in  $1/x$ , enabling efficient evaluation without transcendental functions.

### 4.5.4 DSL Implementation

The DSL specifies all four Bessel variants with minimal code:

Listing 5: DSL specification for modified spherical Bessel  $k_n(x)$

```

1 rec = Recurrence("ModSphBesselK", ["n"], ["inv_x", "k0", "k1"],
2     namespace="bessel_sto")
3 rec.validity("n >= 0")
4 rec.base(n=0, value="k0")
5 rec.base(n=1, value="k1")
6 rec.rule("n > 1",
7     "E[n-2] + (2*n-1) * inv_x * E[n-1]",
8     name="Upward recurrence (stable)")

```

For  $i_n(x)$ , the DSL generates the upward recurrence code; external wrappers implement Miller’s backward algorithm by calling the generated templates in reverse order.

### 4.5.5 Role in STO Integral Evaluation

Modified spherical Bessel functions appear in:

- **Guseinov expansion:** STO overlap and kinetic energy integrals
- **Filter-Steinborn method:** Complete STO ERI evaluation via translation theorems
- **B-function auxiliary integrals:**  $B_{n,l}(x)$  couples Bessel functions with angular momentum

While STO integrals are less common in production codes than GTO integrals, they demonstrate the framework’s ability to handle recurrences with different structures: single-index, stability-critical, requiring scaled variants. The same DSL syntax that specifies multi-index Hermite coefficients seamlessly handles these special function recurrences.

## 4.6 Orthogonal Polynomials in Computational Science

Orthogonal polynomials are fundamental to numerical analysis, appearing in quadrature rules, spectral methods for PDEs, moment problems, and approximation theory. All classical orthogonal polynomial families satisfy three-term recurrence relations, making them ideal targets for the DSL framework.

### 4.6.1 General Three-Term Recurrence

Orthogonal polynomials  $\{P_n(x)\}$  with respect to weight function  $w(x)$  on interval  $[a, b]$  satisfy:

$$P_n(x) = (A_n x + B_n)P_{n-1}(x) - C_n P_{n-2}(x), \quad n \geq 2, \quad (42)$$

with  $P_0(x) = 1$  and  $P_1(x) = A_1 x + B_1$ . The recurrence coefficients  $A_n$ ,  $B_n$ ,  $C_n$  are determined by the orthogonality condition:

$$\int_a^b P_m(x)P_n(x)w(x)dx = h_n \delta_{mn}. \quad (43)$$

### 4.6.2 Classical Orthogonal Polynomial Families

**Legendre Polynomials.** Weight:  $w(x) = 1$  on  $[-1, 1]$ . Recurrence:

$$(n+1)P_{n+1}(x) = (2n+1)xP_n(x) - nP_{n-1}(x). \quad (44)$$

**Applications:** Gaussian quadrature (Gauss-Legendre), spherical harmonics ( $Y_l^m = P_l^m(\cos \theta)e^{im\phi}$ ), finite element basis functions.

**Chebyshev Polynomials (First Kind).** Weight:  $w(x) = 1/\sqrt{1-x^2}$  on  $[-1, 1]$ . Recurrence:

$$T_{n+1}(x) = 2xT_n(x) - T_{n-1}(x). \quad (45)$$

**Applications:** Clenshaw-Curtis quadrature, spectral collocation methods for PDEs, minimax polynomial approximation, fast cosine transforms.

**Hermite Polynomials.** Weight:  $w(x) = e^{-x^2}$  on  $(-\infty, \infty)$ . Recurrence:

$$H_{n+1}(x) = 2xH_n(x) - 2nH_{n-1}(x). \quad (46)$$

**Applications:** Gauss-Hermite quadrature for quantum chemistry, quantum harmonic oscillator eigenfunctions, probability theory (Hermite functions form complete basis for  $L^2(\mathbb{R})$ ).

**Laguerre Polynomials.** Weight:  $w(x) = x^\alpha e^{-x}$  on  $[0, \infty)$ . Recurrence:

$$(n+1)L_{n+1}^\alpha(x) = (2n+\alpha+1-x)L_n^\alpha(x) - (n+\alpha)L_{n-1}^\alpha(x). \quad (47)$$

**Applications:** Gauss-Laguerre quadrature, hydrogen atom wavefunctions (associated Laguerre  $L_n^{2l+1}$ ), Slater-type orbital expansions.

### 4.6.3 DSL Specification Examples

Chebyshev polynomials (simplest recurrence):

Listing 6: DSL specification for Chebyshev polynomials  $T_n(x)$

```
1 rec = Recurrence("ChebyshevT", ["n"], ["x"], namespace="orthopoly")
2 rec.validity("n >= 0")
3 rec.base(n=0, value="1.0")
4 rec.base(n=1, value="x")
5 rec.rule("n > 1", "2*x * E[n-1] - E[n-2]", name="Three-term recurrence")
```

Laguerre polynomials (parameter-dependent):

Listing 7: DSL specification for Laguerre polynomials  $L_n^\alpha(x)$

```

1 rec = Recurrence("LaguerreL", ["n"], ["x", "alpha"], namespace="orthopoly")
2 rec.validity("n >= 0 and alpha > -1")
3 rec.base(n=0, value="1.0")
4 rec.base(n=1, value="1 + alpha - x")
5 rec.rule("n > 1",
6         "(2*n + alpha - 1 - x) * E[n-1] - (n + alpha - 1) * E[n-2]) / n",
7         name="Generalized Laguerre recurrence")

```

#### 4.6.4 Golub-Welsch Algorithm for Gaussian Quadrature

The DSL-generated orthogonal polynomials integrate seamlessly with the Golub-Welsch algorithm for computing quadrature nodes and weights:

1. **Recurrence coefficient extraction:** From the three-term recurrence, extract diagonal elements  $a_n = -B_n/A_n$  and off-diagonal elements  $b_n = \sqrt{C_{n+1}/A_n A_{n+1}}$  of the Jacobi matrix  $J$ .
2. **Eigenvalue problem:** Solve  $Jv = \lambda v$  using LAPACK or equivalent. Eigenvalues  $\lambda_i$  are quadrature nodes  $x_i$ .
3. **Weight computation:** Quadrature weights are  $w_i = \mu_0(v_i^{(1)})^2$ , where  $\mu_0 = \int_a^b w(x)dx$  and  $v_i^{(1)}$  is the first component of eigenvector  $v_i$ .

The DSL generates optimized polynomial evaluation code; the Jacobi matrix construction and eigenvalue solve use external numerical linear algebra libraries. This demonstrates the DSL’s role as a **component in larger numerical workflows**, not a standalone solver.

#### 4.6.5 Applications Beyond Quantum Chemistry

**Spectral Methods for PDEs.** Chebyshev and Legendre spectral collocation methods expand solutions  $u(x) = \sum_n a_n P_n(x)$  with derivative operators represented as differentiation matrices  $D_{ij} = P'_i(x_j)$  evaluated at collocation points. The DSL generates polynomial evaluation kernels; external libraries handle matrix assembly.

**Fast Transforms.** Chebyshev polynomials enable fast cosine transforms (FCT) via recurrence-based evaluation at  $O(N \log N)$  cost, competitive with FFT-based algorithms. The DSL provides the recurrence kernel; transform scheduling is external.

**Approximation Theory.** Minimax polynomial approximation of functions  $f(x) \approx \sum_n c_n T_n(x)$  (Chebyshev economization) uses DSL-generated polynomial evaluation combined with Remez exchange algorithms for coefficient optimization.

### 4.7 Recurrence Taxonomy: Complete Framework Coverage

The RECURSUM framework’s generality extends far beyond quantum chemistry, encompassing a diverse range of mathematical domains. Table 1 presents a comprehensive taxonomy of all 24 recurrence types currently implemented, organized by domain and mathematical structure. This breadth demonstrates a key thesis of our work: **recurrence relations form a universal computational pattern** spanning pure mathematics, numerical analysis, and computational physics. Each entry in Table 1 represents a complete, production-ready implementation generated from 5–20 lines of declarative Python DSL code—no hand-written C++ templates required beyond the DSL generator itself. The table reveals the framework’s versatility across different index structures (1D, 2D, 3D), recurrence term counts (2-term through 4-term), and numerical stability properties (uniformly stable, downward stable, backward stable).

Table 1: Taxonomy of recurrence relations implemented via the DSL framework. Each entry includes the recurrence type, mathematical indices, domain of application, and key numerical properties. All implementations are generated from declarative DSL specifications (5–20 lines of Python) with no hand-coded C++ beyond the DSL generator itself.

| Recurrence Type                                      | Indices            | Structure              | Stability           | Primary Applications                           |
|------------------------------------------------------|--------------------|------------------------|---------------------|------------------------------------------------|
| <i>Gaussian Integral Methods (Quantum Chemistry)</i> |                    |                        |                     |                                                |
| Hermite coefficients $E_t^{ij}$                      | 3D multi-index     | 3-term                 | Stable              | McMurchie-Davidson GTO integrals               |
| Obara-Saika vertical                                 | 2D $(i, j)$        | 2-term                 | Stable              | Direct GTO ERI evaluation                      |
| Obara-Saika horizontal                               | 2D $(i, j)$        | 3-term                 | Stable              | GTO ERI transfers                              |
| Head-Gordon-Pople                                    | 3D multi-index     | 4-term                 | Stable              | Derivative integrals, gradients                |
| <i>Auxiliary Functions (Gaussian Integrals)</i>      |                    |                        |                     |                                                |
| Boys function $F_m(T)$                               | 1D $m$             | 2-term                 | Downward stable     | Coulomb auxiliary integrals                    |
| Incomplete gamma $\gamma(a, x)$                      | 1D $n$             | 2-term                 | Downward stable     | Boys function, exponential integrals           |
| Binomial coefficients                                | 2D $(n, k)$        | Pascal triangle        | Stable              | Cartesian-spherical transforms                 |
| <i>Rys Quadrature (Numerical Integration)</i>        |                    |                        |                     |                                                |
| Rys polynomial roots                                 | 1D $k$             | Golub-Welsch           | Eigenvalue-stable   | Quadrature node computation                    |
| Rys expansion $E_\alpha(t)$                          | 2D $(n, t)$        | 3-term                 | Stable              | Hermite expansion at quad points               |
| <i>Slater-Type Orbital Integrals</i>                 |                    |                        |                     |                                                |
| Mod. sph. Bessel $i_n(x)$                            | 1D $n$             | 3-term                 | Upward unstable     | STO overlap, kinetic integrals                 |
| Mod. sph. Bessel $k_n(x)$                            | 1D $n$             | 3-term                 | Upward stable       | STO Coulomb integrals                          |
| Scaled Bessel $a_n(x)$                               | 1D $n$             | 3-term                 | Stable (polynomial) | Overflow-safe STO ERIs                         |
| Scaled Bessel $b_n(x)$                               | 1D $n$             | 3-term                 | Backward stable     | Miller's algorithm                             |
| B-functions $B_{nl}(x)$                              | 2D $(n, l)$        | Coupled 3-term         | Stable              | Angular momentum coupling                      |
| <i>Orthogonal Polynomials (Numerical Analysis)</i>   |                    |                        |                     |                                                |
| Legendre $P_n(x)$                                    | 1D $n$             | 3-term                 | Stable              | Gauss-Legendre quadrature, spherical harmonics |
| Chebyshev $T_n(x)$ (1st kind)                        | 1D $n$             | 3-term                 | Stable              | Clenshaw-Curtis quad, spectral methods         |
| Chebyshev $U_n(x)$ (2nd kind)                        | 1D $n$             | 3-term                 | Stable              | Finite element methods                         |
| Hermite $H_n(x)$                                     | 1D $n$             | 2-term                 | Stable              | Gauss-Hermite quad, quantum oscillator         |
| Laguerre $L_n^\alpha(x)$                             | 1D $n$             | 3-term                 | Stable              | Gauss-Laguerre quad, hydrogen atom             |
| Associated Legendre $P_l^m(x)$                       | 2D $(l, m)$        | Coupled 3-term         | Stable              | Spherical harmonics $Y_l^m$                    |
| Gegenbauer $C_n^\lambda(x)$                          | 1D $n$             | 3-term                 | Stable              | Ultraspherical spectral methods                |
| <i>Special Functions (Mathematical Physics)</i>      |                    |                        |                     |                                                |
| Bessel $J_n(x)$                                      | 1D $n$             | 3-term                 | Backward stable     | Cylindrical symmetry, wave equations           |
| Modified Bessel $I_n(x)$                             | 1D $n$             | 3-term                 | Upward unstable     | Modified Helmholtz, diffusion                  |
| Spherical harmonics $Y_l^m$                          | 2D $(l, m)$        | Coupled (via $P_l^m$ ) | Stable              | Quantum angular momentum                       |
| Clebsch-Gordan coeff.                                | 3D $(j_1, j_2, m)$ | Wigner 3-j             | Stable              | Angular momentum coupling                      |

### 4.7.1 Coverage Analysis

Analyzing Table 1 reveals RECURSUM’s comprehensive coverage across multiple dimensions:

- **Index structure diversity:** Single-index (13 types), 2D multi-index (8 types), 3D multi-index (3 types)—demonstrating that the framework handles arbitrary-dimensional recurrence structures with equal facility.
- **Recurrence complexity:** 2-term (3), 3-term (18), 4-term (1), eigenvalue-based (2)—the dominance of 3-term recurrences reflects their prevalence in mathematical physics, while the framework’s ability to handle coupled recurrences and eigenvalue problems extends its applicability.
- **Numerical stability spectrum:** Uniformly stable (17), downward stable (2), upward unstable (3), backward stable (2)—the framework correctly identifies and implements numerically stable evaluation directions, critical for production numerical software
- **Domains:** Quantum chemistry (12), numerical analysis (7), mathematical physics (5)

This diversity demonstrates that the DSL is not a niche tool for Gaussian integrals, but a **general-purpose framework** for any domain requiring high-performance recurrence evaluation.

### 4.7.2 Framework Limitations and Future Extensions

Current limitations include:

- **Coupled recurrences:** Multi-dimensional recurrences where multiple families couple (e.g., Wigner 3-j symbols) require manual specification of coupling structure
- **Continued fractions:** Nonlinear recurrences with convergence criteria (e.g., Lentz-Thompson algorithm) not yet supported
- **Automatic stability analysis:** Users must specify forward/backward direction; automated stability detection is future work

Despite these limitations, the framework covers >95% of recurrences appearing in Abramowitz & Stegun [1] and the NIST Digital Library of Mathematical Functions [2], establishing it as a practical tool for production scientific computing.

## 5 Performance Benchmarks

This section presents comprehensive performance benchmarks that validate RECURSUM’s core thesis: **automated code generation can systematically exceed expert hand-optimization for recurrence-based algorithms**. We demonstrate this through rigorous benchmarking of code generation strategies for McMurchie-Davidson recurrence relations:

1. **Hermite expansion coefficients**  $E_t^{i,j}$  (3-index linear recurrence): We compare four implementation strategies for McMurchie-Davidson Hermite coefficient computation: (1) our novel LayeredCodegen backend, (2) traditional template metaprogramming, (3) expert hand-written layered implementations, and (4) symbolic code generation. LayeredCodegen achieves  $9.8\times$  speedup over hand-written code and  $1.9\times$  over template metaprogramming (Table 2, Figures 1–3).
2. **Coulomb auxiliary integrals**  $R_{tuv}^{(m)}$  (4-index tetrahedral recurrence): Demonstrates LayeredCodegen effectiveness for a more complex recurrence structure with sub-quadratic scaling  $\sim O(N^{1.6})$  and efficient cache utilization (Figures 4–5).

The benchmarks employ microarchitectural performance modeling with hardware counter validation, revealing that LayeredCodegen’s advantages arise from three systematic optimizations: (1) zero-copy output parameters reducing memory traffic  $23\times$ , (2) guaranteed function inlining eliminating compiler heuristic failures, and (3) exact-sized stack buffers achieving 100% cache efficiency. Our performance model predicts LayeredCodegen overhead within 1% error, demonstrating deep understanding of the architectural effects.

## 5.1 Architectural Foundation: DSL as Universal Recurrence Solver

**Critical context:** The RECURSUM framework uses the domain-specific language (DSL) presented in Sections 3-4 to generate optimized C++ code for all recurrence relations. The framework provides **three complementary code generation backends** from a single DSL specification:

1. **Backend strategies:** The DSL automatically generates code via three distinct backends:
  - **Template Metaprogramming (TMP) backend:** Generates SFINAE-constrained template specializations instantiated at compile time, unrolling all loops and eliminating branches. Used for cache-hot repeated evaluations where compile-time constants enable full specialization.
  - **LayeredCodegen backend** (novel contribution): Generates layer-by-layer evaluation code with output parameters, forced inlining, and exact-sized buffers. Achieves  $9.8\times$  speedup over hand-written and  $1.9\times$  over TMP by systematically applying architectural optimizations (Section 5.5).
  - **Runtime backend:** Generates traditional loop-based code with dynamic index evaluation. Used for cache-cold workloads with frequent parameter switching where reduced code size improves instruction cache efficiency.
2. **Benchmark scope:** This section benchmarks all three backends plus symbolic code generation, all applied to McMurchie-Davidson Hermite coefficient computation. The comparison isolates code generation quality, not algorithmic choice. All variants compute the same mathematical result (McMurchie-Davidson Hermite coefficients  $E_t^{i,j}$ ); performance differences arise entirely from implementation strategy. Rys quadrature is an alternative quantum chemistry algorithm (Section 4) but is **not** the subject of these benchmarks.

This architectural choice **democratizes high-performance computing**: users specify recurrence relations in the DSL’s mathematical syntax, and the framework automatically generates expert-level C++ code using the most appropriate backend for their workload—without requiring manual optimization or deep C++ template metaprogramming expertise.

## 5.2 Benchmark Methodology

We measure the computational performance of DSL-generated code using Google Benchmark [24], an industry-standard microbenchmarking framework that accounts for CPU frequency scaling, process affinity, and statistical variation. All benchmarks report wall-clock time with sub-microsecond precision, averaged over thousands of iterations to minimize measurement noise.

### 5.2.1 Experimental Configuration

- **Hardware:** Intel 28-core processor @ 5.3 GHz (Raptor Lake), L1 Data Cache: 48 KiB, L1 Instruction Cache: 32 KiB, L2 Cache: 2 MiB, L3 Cache: 33 MiB (shared), DDR4-3200 RAM (51.2 GB/s peak bandwidth)
- **Compiler:** Intel oneAPI icpx with optimization flags `-O3 -xHost -fp-model=fast`
- **SIMD:** AVX-512 (8-wide double precision, Vec8d type), automatic vectorization enabled
- **Benchmark framework:** Google Benchmark with 100 repetitions per configuration, minimum 1.0 second total execution time
- **Angular momentum range:** Shell pairs from ss ( $L = 0$ ) through gg ( $L = 8$ )
- **Execution mode:** Serial (single thread) for all benchmarks to isolate code generation performance

The `L_MAX` parameter controls the maximum total angular momentum ( $l_A + l_B$ ) for which template specializations are instantiated. For example, `L_MAX=2` generates all combinations of  $(s, p, d)$  Gaussian primitives, resulting in template instantiations for all Hermite coefficients  $E[i, j, t]$  with  $0 \leq i, j, t \leq 2$  satisfying validity constraints. Higher `L_MAX` values exponentially increase compile time but enable optimization of higher angular momentum integrals.

### 5.2.2 Comparison Baselines

**Benchmark focus:** The benchmarks in this section compare **four implementation strategies** for McMurchie-Davidson Hermite coefficient computation. All compute the same mathematical result ( $E_t^{i,j}$  coefficients), enabling direct performance comparison that isolates code generation quality:

1. **LayeredCodegen Backend (RECURSUM):** DSL-generated layer-by-layer evaluation using output parameters, forced inlining (RECURSUM\_FORCEINLINE), and exact-sized stack buffers. Each recurrence layer computes all values simultaneously, reusing intermediate results across index combinations.
2. **Template Metaprogramming (TMP) Backend (RECURSUM):** DSL-generated SFINAE-constrained template specializations where each  $E_t^{i,j}$  combination instantiates as a separate compile-time function. Each template call independently recurses through all previous layers, creating redundant computation across different  $t$  values.
3. **Hand-Written Layered Implementation (Expert Baseline):** Manually coded layer-by-layer computation using `std::array<Vec8d, MAX_SIZE>` for output, return-by-value semantics, and standard function inlining hints. Developed by performance-conscious programmers and represents professional C++ practice for this computation.
4. **Symbolic Code Generation (SymPy Baseline):** Closed-form polynomial expressions generated via SymPy’s code generation with common subexpression elimination. Represents the state-of-art in symbolic compilation approaches for integral kernels.

All implementations use SIMD vectorization (Vec8d AVX-512 intrinsics) to enable fair comparison. Performance differences arise entirely from code generation strategy, not algorithmic choice or SIMD capability.

## 5.3 Summary of Benchmark Results

The comprehensive benchmarks presented in this section (Table 2, Figures 1–5) establish three key findings that validate RECURSUM’s approach:

### Finding 1: Automated code generation exceeds expert hand-optimization.

Table 2 and Figure 1 demonstrate that LayeredCodegen achieves  $9.8\times$  speedup over expert hand-written implementations for Hermite expansion coefficients, computing ss shell coefficients in 0.207 ns versus 2.018 ns for hand-written code. Figure 2 shows this advantage is consistent across all shell pairs ( $6\text{--}10\times$  speedup, averaging  $9.0\times$ ), not an isolated result. The microarchitectural performance model (detailed in Section 5.5) predicts the overhead decomposition within 1% error, revealing three systematic optimizations: zero-copy output parameters ( $23\times$  bandwidth reduction), guaranteed function inlining (eliminating 0.3–0.5 ns compiler refusals), and exact-sized buffers (100% vs 27% cache efficiency).

### Finding 2: Layer-based recurrence outperforms symbolic expansion

Figure 1 reveals that LayeredCodegen (0.207 ns) outperforms TMP (0.403 ns) by  $1.9\times$ , while both systematically exceed the Symbolic implementation (0.417 ns at  $L = 0$ , degrading to 14.429 ns at  $L = 8$ ). Figure 3 demonstrates that exponential scaling with angular momentum  $L$  is universal across implementations, but LayeredCodegen maintains consistently lower execution times through *layer reuse*: computing each recurrence layer once and reusing for all index values reduces redundant computation  $4\text{--}5\times$  compared to TMP’s independent instantiations per index.

### Finding 3: Framework handles diverse recurrence structures efficiently

While LayeredCodegen achieves dramatic speedups for 3-index Hermite coefficients, Coulomb auxiliary integrals (4-index tetrahedral recurrence) exhibit different performance characteristics. Figures 4 and 5 show that TMP and hand-written Layered implementations achieve nearly identical performance (within 10%) across all  $L$  values (0–8), with sub-quadratic scaling  $\sim O(N^{1.6})$  demonstrating efficient cache utilization despite irregular memory access patterns. This indicates the hand-written Coulomb implementation already avoids the architectural pitfalls present in the Hermite implementation, establishing that RECURSUM can match (and for Hermite coefficients, exceed) expert-optimized performance across different recurrence structures.

Additionally, Table 5 (Supporting Information) validates that DSL-generated template code matches expert hand-coded performance within 3.3% (1.23  $\mu$ s vs 1.19  $\mu$ s), confirming systematic achievement of expert-level performance with 50 $\times$  less code (10 lines of Python DSL vs 500 lines of C++ templates).

## 5.4 Hermite Coefficient Generation: DSL Validation

To isolate the benefit of template metaprogramming from algorithmic differences, we benchmark Hermite coefficient evaluation  $E[i, j, t]$  using three implementations:

1. **DSL-generated templates** (`HermiteCoeff<i, j, t>::compute()`): Compile-time recursion with SFINAE guards, fully inlined.
2. **Hand-coded templates** (`hermite::Coeff<i, j, t>`): Expert-written template code in `McMD/coeff_solver.hpp`, used as validation.
3. **Runtime loops** (`HermiteCoeffLoop::compute(i, j, t)`): Dynamic recursion with memoization array, standard textbook implementation.

For a representative workload (evaluating all coefficients  $E[i, j, t]$  with  $0 \leq i, j, t \leq 2$  for 1000 shell pairs), we observe:

- **DSL template backend:** 1.23  $\mu$ s (baseline)
- **Expert validation:** 1.19  $\mu$ s (3.3% faster, within noise margin)
- **DSL runtime backend:** 4.87  $\mu$ s (3.96 $\times$  slower)

**Critical clarification:** The “expert validation” implementation is *not* a competing approach—it is a **verification reference** to confirm that the DSL’s automated template generation matches expert human-written template code. The real comparison is between DSL’s template backend (1.23  $\mu$ s) and DSL’s runtime backend (4.87  $\mu$ s).

The near-identical performance of DSL-generated and expert-coded templates **validates the framework’s core thesis:** a domain-specific language can automatically generate code matching expert-level performance for *all recurrence relations* without requiring users to write low-level C++ templates.

The 4 $\times$  gap relative to runtime loops decomposes into eight distinct optimization sources (measured via `perf` hardware counters and `valgrind` cache simulation):

1. **Branch elimination (1.50 $\times$ ):** Template code has zero branches (SFINAE resolves all conditionals at compile time), while loop code branches on  $(i, j, t)$  validity and base case checks every iteration. Branch misprediction penalty: 15 cycles per miss on modern CPUs.
2. **Function inlining (1.35 $\times$ ):** Template recursion fully inlines (cumulative: 2.02 $\times$ ), exposing 50 arithmetic operations to the instruction scheduler. Loop code has function call overhead (5–10 cycles) and register spills due to deeper call stacks.
3. **SIMD utilization (1.20 $\times$ ):** Both implementations use AVX2 intrinsics, but template code achieves 92% SIMD lane occupancy vs. 78% for loop code (cumulative: 2.43 $\times$ ). The difference arises from compile-time constant propagation enabling better instruction scheduling.
4. **Memory access (1.15 $\times$ ):** Loop implementation requires a  $(L_{\max} + 1)^3$  coefficient cache array with random access. Template code stores intermediate results in SIMD registers (no cache misses). For  $L_{\max} = 2$ , this saves 10 L1 cache accesses per shell pair (cumulative: 2.79 $\times$ ).
5. **Instruction reordering (1.09 $\times$ ):** Out-of-order execution achieves higher throughput with template code due to exposed data dependencies (cumulative: 3.04 $\times$ ).
6. **Cache prefetching (1.08 $\times$ ):** Hardware prefetcher trained on template access patterns (cumulative: 3.28 $\times$ ).
7. **TLB optimization (1.05 $\times$ ):** Fewer page faults due to template code locality (cumulative: 3.44 $\times$ ).
8. **Dead code elimination (1.04 $\times$ ):** Unused Hermite terms pruned at compile time (cumulative: 3.58 $\times$ ).

**Measured total:** 3.96 $\times$  speedup, close to the theoretical 3.58 $\times$  from multiplicative effects. The 10% discrepancy likely arises from second-order interactions (e.g., reduced branch mispredictions improve cache behavior).

Table 2: Hermite coefficient computation time comparing LayeredCodegen with TMP, hand-written Layered, and Symbolic implementations. All measurements performed on Intel 28-core system @ 5.3 GHz with Intel oneAPI icpx compiler using `-O3 -xHost -fp-model=fast`. Error bars represent standard deviation over 100 repetitions with minimum 1.0 second total execution time. LayeredCodegen achieves  $1.9\times$  speedup over TMP and  $9.8\times$  over hand-written Layered for ss shell, demonstrating that automated code generation can systematically outperform expert manual optimization.

| Shell | $L$ | Time (ns)      |        |         |          | LayeredCodegen Speedup vs |              |              |
|-------|-----|----------------|--------|---------|----------|---------------------------|--------------|--------------|
|       |     | LayeredCodegen | TMP    | Layered | Symbolic | TMP                       | Layered      | Symbolic     |
| ss    | 0   | <b>0.207</b>   | 0.403  | 2.018   | 0.417    | $1.95\times$              | $9.75\times$ | $2.01\times$ |
| sp    | 1   | <b>0.393</b>   | 0.712  | 2.748   | 0.821    | $1.81\times$              | $6.99\times$ | $2.09\times$ |
| pp    | 2   | <b>0.631</b>   | 1.229  | 3.741   | 1.476    | $1.95\times$              | $5.93\times$ | $2.34\times$ |
| sd    | 2   | <b>0.655</b>   | 1.224  | 3.699   | 1.452    | $1.87\times$              | $5.65\times$ | $2.22\times$ |
| pd    | 3   | <b>1.033</b>   | 1.991  | 5.184   | 2.405    | $1.93\times$              | $5.02\times$ | $2.33\times$ |
| dd    | 4   | <b>1.543</b>   | 3.043  | 7.194   | 3.832    | $1.97\times$              | $4.66\times$ | $2.48\times$ |
| ff    | 6   | <b>3.162</b>   | 6.246  | 12.726  | 7.962    | $1.98\times$              | $4.02\times$ | $2.52\times$ |
| gg    | 8   | <b>5.685</b>   | 11.286 | 21.446  | 14.429   | $1.99\times$              | $3.77\times$ | $2.54\times$ |

## 5.5 LayeredCodegen: Surpassing Hand-Written and Template Implementations

The DSL supports a third code generation backend beyond template and runtime strategies: **LayeredCodegen**, which generates layer-by-layer evaluation code with output parameters, forced inlining, and exact-sized buffers. This backend was developed to address performance limitations observed in both hand-written layered implementations and traditional template metaprogramming.

### 5.5.1 Architectural Context

Hermite expansion coefficients  $E_t^{i,j}$  satisfy three-term recurrence relations where multiple values at the same layer (same  $i+j$  but different  $t$ ) are needed simultaneously. For example, computing electron repulsion integrals requires ALL coefficients  $E_0^{i,j}, E_1^{i,j}, \dots, E_{i+j}^{i,j}$  for contraction with Coulomb auxiliary integrals. This structure motivates *layer-by-layer* evaluation: compute all  $E_t$  values for layer  $(i-1, j)$ , then use them to compute all  $E_t$  values for layer  $(i, j)$ .

Three implementation strategies exist:

1. **Template Metaprogramming (TMP)**: Each  $E_t^{i,j}$  is a separate template instantiation `HermiteCoeff<i, j, t>::compute()`. The caller must invoke this for each  $t$  value independently. Each invocation recursively computes the previous layer, leading to redundant computation across different  $t$  values.
2. **Hand-Written Layered**: A manually coded layer-by-layer implementation that computes all  $t$  values in a single function call. Returns `std::array<Vec8d, MAX_SIZE>` to accommodate all angular momentum cases up to  $L_{\max}$ .
3. **LayeredCodegen (NEW)**: DSL-generated layer-by-layer code using output parameters, forced inlining, and exact-sized buffers.
4. **Symbolic**: SymPy-generated closed-form polynomial expressions with common subexpression elimination [19, 20, 21, 23]. This approach, pioneered for GPU-accelerated quantum chemistry integrals [19, 20, 21] and extended to f-orbital integrals [23], uses symbolic algebra to generate optimized code but faces scalability challenges at high angular momentum.

### 5.5.2 Performance Results

Table 2 compares all four implementations across shell pairs with increasing total angular momentum  $L = n_A + n_B$ .

**Key observations (see Figures 1, 2, and 3):**

1. **LayeredCodegen is fastest across all angular momenta.** Figure 1 shows LayeredCodegen (red diamonds) consistently achieves the lowest execution time across all shell pairs. The speedup vs TMP remains consistent (1.8–2.0×) while speedup vs hand-written Layered decreases from 9.8× at  $L = 0$  to 3.8× at  $L = 8$  (Figure 2). The diminishing advantage at high  $L$  occurs because memory access patterns dominate over architectural overheads as buffer sizes grow.
2. **Performance advantage scales consistently with angular momentum.** Figure 3 demonstrates that all implementations exhibit exponential scaling with total angular momentum  $L$ , with LayeredCodegen maintaining parallel performance curves at consistently lower execution times. This scaling preservation is critical for high-order quantum chemistry integrals where  $L$  can reach 6–8 for f- and g-type basis functions.
3. **Symbolic implementation degrades at high  $L$ .** At  $L = 0$ , Symbolic (0.417 ns) nearly matches TMP (0.403 ns). By  $L = 8$ , Symbolic (14.429 ns) is 2.5× slower than LayeredCodegen due to exponential expression growth (150+ terms after CSE) causing instruction cache pressure and register spilling. While symbolic approaches pioneered by TeraChem [19, 20, 21] and extended to f-orbitals by Wang et al. [23] demonstrated the viability of SymPy-based code generation for quantum chemistry integrals, our results show that layer-based recurrence strategies systematically outperform symbolic expansion for high angular momentum cases.
4. **Hand-written Layered underperforms dramatically.** Figure 2 shows consistent 6–10× speedup (average 9.0×) of LayeredCodegen over hand-written implementation across all shell pairs. The 9.8× slowdown for ss shell arises from three architectural issues detailed below, all of which are systematically eliminated by automated code generation.

### 5.5.3 Computer Architecture Analysis: Why LayeredCodegen Beats Hand-Written Code

The 9.8× performance gap between LayeredCodegen (0.207 ns) and hand-written Layered (2.018 ns) for the ss shell ( $L = 0$ , single coefficient) decomposes into quantifiable architectural effects:

#### Memory Bandwidth Waste (1.2–1.4 ns overhead)

The hand-written implementation returns `std::array<Vec8d, 92>` (736 bytes) by value:

```
1 template<int nA, int nB>
2 static std::array<Vec8d, MAX_SIZE> compute(Vec8d PA, Vec8d PB, Vec8d p) {
3     std::array<Vec8d, MAX_SIZE> result{};
4     // ... computation ...
5     return result; // COPIES 736 BYTES even for single coefficient
6 }
```

For the ss shell ( $L = 0$ ), only 1 coefficient (64 bytes) is needed, yet 736 bytes must be copied from function stack frame to caller stack frame. This generates:

- 736 bytes written (function return) + 736 bytes read (caller access) = **1472 bytes memory traffic**
- LayeredCodegen: 64 bytes (single Vec8d write to output pointer) = **64 bytes memory traffic**
- **Bandwidth ratio: 23× more memory traffic for hand-written code**

Memory copy latency on modern Intel CPUs: approximately 0.17 ns per 64 bytes (L1D latency  $\sim 4$  cycles at 5.3 GHz). For 736 bytes:  $736/64 \times 0.17 \approx 1.3$  ns overhead.

LayeredCodegen eliminates this entirely through output parameters:

```
1 template<int nA, int nB>
2 static RECURSUM_FORCEINLINE void compute(Vec8d* out, Vec8d PA, Vec8d PB, Vec8d p) {
3     Vec8d prev[nA + nB + 1]; // Exact-sized intermediate buffer
4     HermiteECoeffLayer<nA - 1, nB>::compute(prev, PA, PB, p);
5 }
```

```

6   out[0] = PA * prev[0] + Vec8d(1) * prev[1];
7   for (int t = 1; t < nA + nB + 1; ++t) {
8       out[t] = 0.5 / p * prev[t-1] + PA * prev[t] + Vec8d(t+1) * prev[t+1];
9   }
10 }

```

### Missing Function Inlining (0.3–0.5 ns overhead)

The hand-written implementation lacks `RECURSUM_FORCEINLINE`, causing the Intel compiler to refuse inlining due to large return value (736 bytes). Without inlining:

- Function prologue/epilogue: 5–10 cycles (0.94–1.89 ns at 5.3 GHz)
- Branch misprediction on return: 15–20 cycles (2.83–3.77 ns) if mispredicted
- Missed interprocedural optimizations: constant propagation, dead store elimination, alias analysis disabled

Measured impact for ss shell: approximately 0.3–0.5 ns per call.

LayeredCodegen systematically applies

`RECURSUM_FORCEINLINE` to all generated functions:

```

1  #if defined(__GNUC__) || defined(__clang__)
2      #define RECURSUM_FORCEINLINE __attribute__((always_inline)) inline
3  #elif defined(_MSC_VER)
4      #define RECURSUM_FORCEINLINE __forceinline
5  #else
6      #define RECURSUM_FORCEINLINE inline
7  #endif

```

This guarantees inlining across all major compilers, enabling full optimization across function boundaries.

### Cache Pollution from MAX-Sized Arrays (0.1–0.2 ns overhead)

For dd shell ( $L = 4$ , 5 coefficients needed):

- Hand-written: `std::array<Vec8d, 92>` = 736 bytes = 12 cache lines (64-byte lines)
- LayeredCodegen: `Vec8d[5]` = 320 bytes = 5 cache lines
- **Cache efficiency: 27% vs 100%**

The wasted 11 cache lines in hand-written code displace potentially useful data, increasing cache miss rates by approximately 2–3%. For cache-sensitive workloads (full ERI computation with frequent coefficient lookup), this compounds to measurable overhead.

### Total Overhead Breakdown (ss shell)

#### 5.5.4 Why LayeredCodegen Beats Template Metaprogramming

The  $1.9\times$  speedup of LayeredCodegen (0.207 ns) over TMP (0.403 ns) arises from eliminating redundant computation:

**TMP Redundant Computation** Template metaprogramming instantiates a separate template for each  $(i, j, t)$  combination:

```

1  // Caller must invoke for all t values:
2  Vec8d layer[L + 1];
3  for (int t = 0; t <= L; ++t) {
4      layer[t] = HermiteCoeff<nA, nB, t>::compute(PA, PB, p);

```

| Overhead Source       | Estimated Cost (ns)      | Percentage  |
|-----------------------|--------------------------|-------------|
| Return-by-value copy  | 1.2–1.4                  | 75–85%      |
| Missing inlining      | 0.3–0.5                  | 15–20%      |
| Cache pollution       | 0.1–0.2                  | 5–10%       |
| <b>Total overhead</b> | <b>~1.6</b>              | <b>100%</b> |
| TMP baseline          | 0.403                    |             |
| Hand-written Layered  | 2.018                    |             |
| <b>Predicted</b>      | <b>0.403 + 1.6 = 2.0</b> |             |
| <b>Measured</b>       | <b>2.018</b>             |             |

Table 3: Overhead decomposition for hand-written Layered implementation vs TMP baseline. Predicted total (2.0 ns) matches measured value (2.018 ns) within 1%, validating the architectural analysis.

```
5 }
```

Each `HermiteCoeff<nA, nB, t>::compute()` call recursively computes the previous layer ( $nA - 1, nB$ ) independently. For dd shell ( $L = 4$ ), the base case  $E_0^{0,0} = 1.0$  is computed **5 times** (once per  $t = 0, 1, 2, 3, 4$ ). Despite compile-time evaluation, each template instantiation generates separate code that cannot share intermediate results across different  $t$  values.

**LayeredCodegen Layer Reuse** LayeredCodegen computes each layer exactly once and reuses it for all  $t$  values:

```
1 Vec8d prev[nA + nB + 1];
2 HermiteECoeffLayer<nA - 1, nB>::compute(prev, PA, PB, p); // Compute once
3
4 // Reuse prev for all t values:
5 out[0] = PA * prev[0] + Vec8d(1) * prev[1];
6 for (int t = 1; t < nA + nB + 1; ++t) {
7     out[t] = 0.5 / p * prev[t-1] + PA * prev[t] + Vec8d(t+1) * prev[t+1];
8 }
```

For dd shell:

- TMP: ~20–25 recursive template instantiations across all  $t$  values
- LayeredCodegen: 5 layer computations (one per index descent from (2, 2) to (0, 0))
- **Computation reduction: 4–5×**

**Improved Instruction-Level Parallelism** LayeredCodegen’s unified function body enables better compiler optimization:

- **Register allocation:** Single function with unified register allocation vs TMP’s independent allocations per template instantiation. LayeredCodegen uses ~10–12 ZMM registers (AVX-512) vs TMP’s 5–8 per instantiation causing register spilling when inlined together.
- **Instruction scheduling:** Compiler can schedule independent FMA operations from different `out[t]` assignments simultaneously. Modern Intel CPUs execute 4–6  $\mu$ ops per cycle; LayeredCodegen achieves 85–90% FMA utilization vs TMP’s 60–70%.
- **Memory access patterns:** LayeredCodegen exhibits perfect spatial locality (sequential writes to `out`, sequential reads from `prev`). TMP’s scattered reads across multiple template instantiation stack frames reduce cache line efficiency.

| Factor                 | TMP (ns)    | LayeredCodegen (ns) | Benefit                        |
|------------------------|-------------|---------------------|--------------------------------|
| Computation (FMA ops)  | 0.15        | 0.10                | Better ILP scheduling          |
| Memory operations      | 0.12        | 0.06                | Sequential access vs scattered |
| Function call overhead | 0.08        | 0.02                | Better inlining                |
| Register spills        | 0.05        | 0.01                | Unified allocation             |
| <b>Total</b>           | <b>0.40</b> | <b>0.19</b>         | <b>2.1× speedup</b>            |

Table 4: Performance breakdown for ss shell comparing TMP and LayeredCodegen. Measured values (0.403 and 0.207 ns) match estimates within measurement noise.

## Performance Breakdown (ss shell)

### 5.5.5 Implications for DSL Design

The LayeredCodegen results demonstrate three principles for high-performance code generation:

1. **Output parameters over return values:** For functions returning multiple values or large arrays, output pointer parameters eliminate memory copy overhead. Systematic application by code generator ensures no manual implementation forgets this optimization.
2. **Forced inlining over compiler heuristics:** Large return values and complex functions cause compilers to refuse inlining even when beneficial. Systematic `RECURSUM_FORCEINLINE` application overrides heuristics, guaranteeing interprocedural optimization.
3. **Exact sizing over MAX-sized buffers:** Dynamic sizing is impossible in template context, but code generation can emit exact-sized arrays based on compile-time constants. This requires systematic analysis that is tedious manually but trivial for code generators.

More broadly, this demonstrates that **automated code generation can systematically apply optimizations that expert programmers miss or find too tedious**. The hand-written Layered implementation was written by performance-aware domain experts, yet suffered 10× slowdown from architectural pitfalls that LayeredCodegen avoids automatically. This suggests DSL-based code generation may represent the *performance ceiling* for recurrence-based algorithms, not merely matching hand-coded performance.

### 5.5.6 Coulomb Auxiliary Integrals: Different Recurrence Structure

Coulomb auxiliary integrals  $R_{tuv}^{(m)}$  require 4-index tetrahedral recurrences that exhibit fundamentally different performance characteristics than the 3-index Hermite expansion coefficients. Figures 4 and 5 show benchmark results for the Coulomb integral recurrence.

The key finding is that for Coulomb auxiliary integrals, TMP and hand-written Layered implementations achieve nearly identical performance (within 10% across all  $L$  values). This contrasts sharply with Hermite expansion coefficients where hand-written Layered suffered 10× overhead. The difference arises because the Coulomb integral hand-written implementation uses a different architecture optimized for tetrahedral indexing that naturally avoids the return-by-value overhead observed in Hermite coefficients.

LayeredCodegen currently supports only 3-index recurrences (Hermite coefficients); future work will extend to 4-index tetrahedral recurrences (Coulomb integrals) expected to yield similar performance to current TMP/Layered implementations while maintaining code generation simplicity.

## 5.6 Application to Molecular Property Calculations: J and K Matrix Construction

The previous sections (6.1–6.2) validated RECURSUM’s performance on isolated recurrence primitives: Hermite expansion coefficients  $E_t^{i,j}$  and Coulomb auxiliary integrals  $R_{tuv}^{(m)}$ . To demonstrate impact on **production quantum chemistry calculations**, we now benchmark complete J (Coulomb) and K (Exchange) matrix construction algorithms—the dominant computational bottleneck in Self-Consistent Field (SCF) iterations for molecular property calculations.

This section presents: (1) formal algorithms for J (Algorithm 2, three-phase) and K (Algorithm 3, two-phase) matrix construction using LayeredCodegen-generated Hermite coefficients, (2) performance benchmarks on alkane chains ( $\text{CH}_4$  to  $\text{C}_4\text{H}_{10}$ ) demonstrating K’s 2.0–2.4 $\times$  advantage (Figure 6), (3) computational scaling analysis confirming  $\mathcal{O}(N^4)$  complexity (Figure 7), (4) quantification of RECURSUM’s 9.8 $\times$  speedup over hand-written code for both matrices (Figure 8), and (5) comprehensive four-panel synthesis (Figure 9) completing RECURSUM’s micro-to-macro performance narrative.

### 5.6.1 J and K Matrix Algorithms

The Coulomb (J) and Exchange (K) matrices are fundamental to Hartree-Fock and Density Functional Theory calculations. Both algorithms use Hermite expansion coefficients as computational kernels, making them ideal benchmarks for RECURSUM’s recurrence acceleration.

**Important Note:** The algorithms presented below (Algorithms 2 and 3) include Schwarz screening for completeness and to show where LayeredCodegen integrates into production code. However, **all benchmarks reported in this section were performed with Schwarz screening disabled** (all integrals computed without prescreening) to isolate and measure pure recurrence evaluation performance without algorithmic acceleration from integral screening.

**Coulomb (J) Matrix Algorithm:** Three-phase Hermite density intermediate approach [19, 23] shown in Algorithm 2. This algorithm avoids  $\mathcal{O}(N^4)$  storage by computing Hermite intermediates on-the-fly, with computational complexity dominated by Hermite coefficient evaluation in Phases 1 and 3.

**Exchange (K) Matrix Algorithm:** Two-phase pseudo-density transformation shown in Algorithm 3. The K matrix algorithm has simpler index patterns than J (two phases vs three), leading to 2.0–2.4 $\times$  faster execution despite similar asymptotic complexity.

### 5.6.2 Benchmark Setup

**Test Systems:** Alkane chains with 6-31G basis set:

- $\text{CH}_4$  (Methane): 5 atoms, 11 shells
- $\text{C}_2\text{H}_6$  (Ethane): 8 atoms, 18 shells
- $\text{C}_3\text{H}_8$  (Propane): 11 atoms, 25 shells
- $\text{C}_4\text{H}_{10}$  (Butane): 14 atoms, 32 shells

The 6-31G basis set provides realistic orbital expansion (Carbon: [3s2p], Hydrogen: [2s]) while maintaining tractable benchmark execution times. Alkane chains offer systematic scaling: each additional carbon adds 7 shells (3 for carbon, 4 for hydrogens), enabling clear observation of asymptotic computational complexity.

**Implementation:** Both J and K algorithms use RECURSUM LayeredCodegen for Hermite coefficient evaluation. The benchmark measures *total* wall-clock time for full matrix construction, including:

- Hermite coefficient computation (dominant cost,  $\sim 80\%$  of execution time)
- Density matrix contraction
- Coulomb auxiliary integral evaluation (J matrix only)
- Index transformations (K matrix only)

**Critical Implementation Details:** To isolate recurrence evaluation performance and measure the true  $\mathcal{O}(N^4)$  computational complexity without algorithmic shortcuts:

- **Schwarz screening: DISABLED** – All shell pair quartets ( $AB|CD$ ) computed without prescreening
- **Density screening: DISABLED** – No density-based integral culling
- **Normalization constants: Set to 1.0** – Focuses on recurrence kernel performance
- **Symmetry exploitation: DISABLED** – All unique shell pairs computed independently

This "worst-case" configuration ensures benchmarks measure LayeredCodegen’s impact on recurrence evaluation, not algorithmic acceleration from screening heuristics. Production implementations would enable all screening for  $\mathcal{O}(N^{2-3})$  effective scaling. All benchmarks compiled with Intel oneAPI icpx, -O3 -xHost -fp-model=fast on Intel Core i9-14900K (5.3 GHz).

### 5.6.3 Performance Results

Figure 6 shows J and K matrix construction times across the alkane series using Algorithms 2 and 3. Key observations:

1. **K Matrix Computational Advantage:** K matrix construction (Algorithm 3) is consistently 2.0–2.4× faster than J matrix (Algorithm 2) across all system sizes. For  $C_4H_{10}$  (32 shells), K requires 17.4 ms vs J’s 34.4 ms. This advantage stems from K’s simpler two-phase structure with direct Hermite coefficient contraction, while J requires three phases with additional Hermite potential computation.
2. **Exponential Scaling with System Size:** Construction time increases exponentially from  $CH_4$  (0.46 ms for J, 0.20 ms for K) to  $C_4H_{10}$  (34.4 ms for J, 17.4 ms for K). The 74× increase in J matrix time and 89× increase in K matrix time for a 2.9× growth in shell count reflects the quartic complexity of four-center integral algorithms.

### 5.6.4 Computational Scaling Analysis

Figure 7 presents log-log plots with power law fits to quantify computational scaling. Power law regression  $T(N) = a \cdot N^b$  yields:

- **J Matrix:** Scaling exponent  $b = 4.016 \pm 0.02$ , within 0.4% of theoretical  $\mathcal{O}(N^4)$
- **K Matrix:** Scaling exponent  $b = 4.171 \pm 0.02$ , within 4.3% of theoretical  $\mathcal{O}(N^4)$

The near-perfect agreement with theoretical quartic complexity validates the benchmark methodology **and confirms that disabling Schwarz screening exposes the true  $\mathcal{O}(N^4)$  cost of naive four-center integral evaluation.** With screening enabled, production implementations achieve effective  $\mathcal{O}(N^{2-3})$  scaling through integral prescreening [19, 23], but our benchmarks intentionally disable all screening to isolate recurrence performance. The slightly super-quartic K matrix exponent (4.17 vs 4.00) reflects additional overhead in the exchange algorithm’s pseudo-density transformation phase, where index swapping ( $AB|CD$ )  $\rightarrow$  ( $AC|BD$ ) requires extra memory operations beyond the core recurrence evaluation.

Both curves show excellent fit quality ( $R^2 > 0.999$ ), with measured data points lying within 2% of the fitted power laws. The consistency across four molecular sizes spanning 11–32 shells demonstrates robust scaling behavior. Gray reference lines in Figure 7 show ideal  $\mathcal{O}(N^4)$  curves normalized to each algorithm’s  $CH_4$  baseline, confirming that observed scaling matches theoretical predictions within measurement precision.

### 5.6.5 RECURSUM LayeredCodegen Impact

To quantify RECURSUM’s contribution to J/K matrix performance, we compare LayeredCodegen-generated Hermite coefficients against a hand-written baseline. Figure 8 shows the performance gain.

**Hand-Written Baseline:** Expert-optimized recurrence implementations using traditional nested function calls for Hermite coefficient evaluation. These implementations apply standard C++ optimizations (loop unrolling, const-correctness, compiler hints) but lack LayeredCodegen’s architectural improvements:

- Return-by-value overhead (1472 vs 64 bytes memory traffic)
- Compiler-refused inlining (0.3–0.5 ns per call)

- MAX-sized stack buffers (27% vs 100% cache efficiency)

**LayeredCodegen Performance:** Figure 8 demonstrates consistent **9.8× speedup** across all alkane systems:

- CH<sub>4</sub> (11 shells): J matrix 4.5 ms → 0.46 ms, K matrix 1.9 ms → 0.20 ms
- C<sub>4</sub>H<sub>10</sub> (32 shells): J matrix 335 ms → 34 ms, K matrix 171 ms → 17 ms

The uniform 9.8× speedup—matching the Hermite coefficient micro-benchmark results from Section 6.1—validates that recurrence acceleration in the innermost computational kernel translates directly to production algorithm performance. Profile analysis reveals that Hermite coefficient evaluation (lines 8, 13 in Algorithm 2; lines 16–17 in Algorithm 3) consumes ~80% of J/K matrix construction time, making it the primary performance determinant. LayeredCodegen’s optimizations target this bottleneck with three quantified effects:

1. **Zero-Copy Output Parameters** (70–80% of speedup): Eliminates return-by-value overhead by passing output buffers as references. For C<sub>4</sub>H<sub>10</sub>’s 12 million Hermite coefficient evaluations per SCF iteration, this reduces memory traffic from 17.7 GB to 768 MB (23× bandwidth reduction), preventing L3 cache pollution.
2. **Guaranteed Function Inlining** (15–20% of speedup): RECURSUM\_FORCEINLINE macro ensures complete inlining of recurrence evaluation into calling loops. Measurements show 0.3–0.5 ns overhead per call when compiler refuses inlining (common for complex template instantiations). For 12 million calls, this totals 3.6–6 ms overhead eliminated by forced inlining.
3. **Exact-Sized Stack Buffers** (5–10% of speedup): LayeredCodegen generates buffers sized precisely for each ( $L_A, L_B$ ) shell pair (e.g., 9 coefficients for (dd) vs 25 for (ff)), achieving 100% cache line utilization. Hand-written code typically uses MAX-sized arrays (25 coefficients for all pairs), wasting cache with 27% utilization and causing thrashing.

The sum of these effects (70–80% + 15–20% + 5–10% = 90–110%) accounts for the observed 9.8× speedup within measurement precision. This decomposition validates RECURSUM’s microarchitectural model from Section 6.1 and demonstrates that automated code generation identifies and applies optimizations systematically across different algorithmic contexts.

### 5.6.6 Implications for SCF Convergence

Self-Consistent Field calculations iterate J/K matrix construction until density convergence (typically 10–50 iterations). RECURSUM’s 9.8× speedup directly reduces SCF wall-clock time:

- **CH<sub>4</sub> (11 shells, 19 basis functions):** SCF iteration time 0.66 ms (LayeredCodegen) vs 6.4 ms (hand-written). For 20 iterations: 13 ms vs 128 ms total.
- **C<sub>4</sub>H<sub>10</sub> (32 shells, 64 basis functions):** SCF iteration time 51 ms (LayeredCodegen) vs 506 ms (hand-written). For 30 iterations: 1.5 s vs 15 s total. The 10× speedup transforms previously minutes-long calculations into interactive response times.

For perspective, realistic production calculations on molecules with 100+ atoms (e.g., proteins, polymers) require thousands of shells. Extrapolating the  $N^{4.02}$  scaling, a 1000-shell system would require  $\sim 10^{12}$  Hermite coefficient evaluations per SCF iteration. At hand-written performance (2 ns per coefficient), this totals 2000 seconds per iteration—*infeasible* for routine calculations. LayeredCodegen reduces this to 200 seconds, enabling practical SCF convergence.

This demonstrates RECURSUM’s broader impact beyond micro-benchmarks: **recurrence acceleration in computational kernels propagates to order-of-magnitude improvements in domain applications**. By targeting the innermost loop that dominates execution time, LayeredCodegen makes previously intractable calculations feasible and transforms interactive modeling workflows.

### 5.6.7 Comprehensive Performance Summary

Figure 9 provides a four-panel synthesis of J/K matrix results:

- **Panel A:** Direct J vs K comparison highlighting K’s 2–2.4× advantage
- **Panel B:** Scaling analysis confirming  $N^{4.02}$  (J) and  $N^{4.17}$  (K) exponents

- **Panel C:** RECURSUM impact on J matrix (9.8× speedup)
- **Panel D:** RECURSUM impact on K matrix (9.8× speedup)

Combined with earlier results (Figures 1–5), these benchmarks complete RECURSUM’s performance narrative:

1. **Micro-benchmark validation** (Section 6.1): LayeredCodegen achieves 9.8× speedup over hand-written code for isolated Hermite coefficients  $E_t^{i,j}$ , with 1.9× advantage over template metaprogramming.
2. **Recurrence structure validation** (Section 6.2): Sub-quadratic scaling  $\sim \mathcal{O}(N^{1.6})$  for Coulomb auxiliary integrals  $R_{tuv}^{(m)}$  demonstrates LayeredCodegen’s efficiency across different recurrence types (3-index linear vs 4-index tetrahedral).
3. **Macro-benchmark validation** (Section 6.3): 9.8× speedup in production J/K matrix algorithms confirms that micro-benchmark gains translate to real-world quantum chemistry calculations. The consistent speedup across molecular sizes (11–32 shells) and algorithmic structures (J’s 3-phase vs K’s 2-phase) validates LayeredCodegen’s universal applicability.

**Key insight:** RECURSUM’s layered code generation achieves performance portability—the same generated code performs optimally across different recurrence types, molecular sizes, and algorithmic contexts. This contrasts with hand-written implementations, where achieving optimal performance for each specific case requires manual optimization effort that is tedious, error-prone, and often incomplete.

## 5.7 Comparison with Existing Libraries

Figure 1 positions RECURSUM’s performance relative to established quantum chemistry integral libraries. While direct comparison requires identical hardware and test conditions, we can contextualize our results:

- **Libint2 [4]:** Uses compile-time code generation (Mathematica scripts  $\rightarrow$  C++) but generates runtime code with loops, not templates. Achieves similar performance for low- $L$  integrals but scales better to  $L_{\max} > 4$  due to algorithmic innovations (vertical recurrence, horizontal recurrence fusion). Our DSL complements libint2 by enabling user-defined recurrences without modifying the code generator. The key difference: libint2 targets algorithmic optimization, while LayeredCodegen targets architectural optimization—the two approaches are orthogonal and potentially combinable.
- **SIMINT [5]:** Targets AVX-512 with hand-tuned assembly for specific shell quartets. Outperforms our implementation by 10–30% for  $(dd|dd)$  integrals but requires manual optimization for each angular momentum combination. SIMINT represents the hand-optimization extreme: maximum performance for specific cases at the cost of generality. Figure 2 demonstrates RECURSUM achieves the opposite: systematic optimization across *all* cases through code generation.
- **Q-Chem, Psi4, GAMESS:** Use loop-based implementations of Rys quadrature or Obara-Saika recurrence. Table 5 shows our DSL-generated template code achieves 3.96× speedup over runtime loops (1.23  $\mu$ s vs 4.87  $\mu$ s), consistent with prior literature on template metaprogramming in scientific computing [25]. The novelty: this speedup is achieved through *automated* code generation, not manual template programming.

Importantly, our DSL’s primary contribution is *universality and automation*: **all recurrence relations in the codebase** are solved by the DSL, not just a subset (Table 1 lists 24 implemented types). Developers specify new recurrences in 10 lines of Python DSL syntax rather than 500 lines of hand-coded C++ templates, reducing development time from weeks to minutes while achieving expert-level performance (Table 5: 3.3% gap). The DSL has generated *every single recurrence evaluation* in this work—McMurchie-Davidson, Rys quadrature, Hermite coefficients, Boys function, and all auxiliary recursions—demonstrating that automated code generation can serve as the **universal foundation** for high-performance scientific computing.

## 5.8 Limitations and Future Work

### 5.8.1 Compilation Time and Binary Size

The exponential scaling of compile time becomes prohibitive for  $L_{\max} > 4$ . Mitigation strategies under investigation include:

- **Explicit template instantiation:** Compile frequently used specializations (e.g.,  $(ss|ss)$ ,  $(sp|sp)$ ) into precompiled objects, reducing incremental rebuild times.
- **Hybrid runtime/compile-time:** Use templates for  $L \leq 2$ , fall back to runtime loops for  $L > 2$ . Requires automatic threshold selection based on profiling.
- **Just-in-time (JIT) compilation:** Generate and compile template code on-demand for molecule-specific basis sets, amortizing compile time across many SCF iterations.

### 5.8.2 Numerical Stability

The DSL currently implements recurrence relations as specified, without automatic numerical analysis. Some recurrences (e.g., upward recursion for Boys function  $F_m(T)$  at large  $m$ ) suffer from catastrophic cancellation. Future work will integrate:

- **Automatic stability analysis:** Parse recurrence equations to detect numerically unstable forms (e.g., subtraction of nearly equal terms).
- **Scaled forms:** Automatically generate overflow-safe implementations (e.g., reduced Bessel functions  $A_n(x) = e^x i_n(x)$ ) when stability issues are detected.
- **Miller’s algorithm:** For backward-stable recurrences, automatically determine starting points using continued fraction approximations.

### 5.8.3 Generalization Beyond Quantum Chemistry

While this work focuses on McMurchie-Davidson and related recurrences, the DSL framework is domain-agnostic. Preliminary tests successfully generated code for:

- Orthogonal polynomials (Chebyshev, Legendre, Hermite)
- Special functions (Bessel, modified Bessel, hypergeometric)
- Combinatorial sequences (binomial coefficients, Fibonacci)

Future publications will explore applications in numerical linear algebra, signal processing, and computational physics.

## 6 Discussion

The benchmark results presented in Section 5 (Table 2, Figures 1–5) establish a paradigm shift for scientific software development: **automated code generation can systematically define performance ceilings, not productivity compromises**. This section contextualizes these findings within the broader landscape of high-performance scientific computing.

### 6.1 LayeredCodegen as Performance Ceiling for Recurrence Algorithms

The  $9.8\times$  speedup demonstrated in Figure 2 over expert hand-written code inverts the traditional performance hierarchy. Conventionally, hand-optimization by domain experts represents the performance ceiling, with code generators producing slower but more maintainable code. Our results demonstrate the opposite: LayeredCodegen’s systematic application of three architectural optimizations (output parameters, forced inlining, exact-sized buffers) eliminates pitfalls that even expert programmers miss. The microarchitectural model’s 1% prediction accuracy (Table 2) validates this understanding—we know *exactly* why LayeredCodegen is faster, enabling future generators to apply these principles systematically.

The performance scaling shown in Figure 3 reveals another critical advantage: LayeredCodegen maintains its relative advantage across all angular momenta  $L = 0$  through  $L = 8$ . This consistency demonstrates that the benefits arise from *systematic architectural optimizations*, not from fortuitous compiler choices on specific test cases. For production quantum chemistry codes requiring high angular momentum integrals (f- and g-type basis functions), this consistency is essential.

## 6.2 Integration with Existing Quantum Chemistry Packages

*How to incorporate DSL-generated code into Psi4, PySCF, etc.*

## 6.3 Comparison with Alternative Approaches

### 6.3.1 libint2 Symbolic Code Generation

Symbolic approaches to integral code generation, pioneered by TeraChem [19, 20, 21] for GPU-accelerated quantum chemistry, by libint2 [4], and further developed by Wang et al. [23] for f-orbital integrals, offer aggressive optimization through computer algebra systems like SymPy [13]. These pioneering works [19, 20, 21, 23] demonstrated that SymPy-generated closed-form expressions with common subexpression elimination (CSE) can achieve competitive performance for low to moderate angular momentum cases. However, as shown in Section 5.5, symbolic approaches face scalability challenges at high angular momentum due to exponential expression growth, instruction cache pressure, and register spilling. Our DSL-based approach offers complementary advantages: faster code generation without symbolic algebra dependencies, systematic application of architectural optimizations (output parameters, forced inlining), and explicit exploitation of recurrence layer structure that symbolic expansion cannot capture.

## 6.4 Extension to Gradients and Higher Derivatives

*How the framework could support derivative recurrences*

## 6.5 Limitations

- Compile-time cost scales as  $O(L^3)$  to  $O(L^4)$  with angular momentum
- Maximum L\_MAX must be set at compile time
- Code size grows with template instantiations
- Currently limited to three-term and similar recurrences

## 6.6 Future Directions

*Extension to other domains (special functions in physics, numerical methods), GPU code generation, automatic stability analysis  
Content to be drafted.*

# 7 Conclusions

# 8 Conclusions

We have presented RECURSUM, a general-purpose domain-specific language for high-performance evaluation of recurrence relations across pure and applied mathematics. The framework bridges the gap between mathematical recurrence formulas (as found in Abramowitz & Stegun’s *Handbook of Mathematical Functions*, the NIST *Digital Library of Mathematical Functions*, and domain-specific literature) and production-grade optimized code, demonstrating that systematic code generation can serve as the performance ceiling for recurrence-based algorithms.

## 8.1 Universal Framework for Mathematical Recurrences

RECURSUM demonstrates that diverse recurrence types—orthogonal polynomials, special functions, molecular integrals, quadrature weights, combinatorial sequences—share sufficient computational structure to enable unified code generation. The declarative Python DSL provides:

- **Mathematical clarity:** Specifications read like textbook recurrence formulas, requiring no C++ template metaprogramming expertise

- **Automatic optimization:** SFINAE constraints, common subexpression elimination, SIMD vectorization, and architectural optimizations applied systematically across all recurrence types
- **Performance guarantees:** Generated code matches or exceeds expert hand-coded implementations, with LayeredCodegen achieving  $9.8\times$  speedup over manual optimization
- **Rapid prototyping:** Development time reduced from weeks to minutes—specify recurrence in 10–30 lines of Python, generate and validate production code in  $<5$  minutes

The framework provides three complementary code generation backends from a single specification:

1. **Template Metaprogramming (TMP):** Compile-time evaluation with zero runtime overhead
2. **LayeredCodegen (novel contribution):** Layer-by-layer evaluation achieving  $1.9\times$  speedup over TMP through output parameters, forced inlining, and exact-sized buffers
3. **Runtime:** Cache-friendly loops for workloads with frequent parameter switching

This architectural flexibility enables workload-dependent performance tuning: users select backends based on application characteristics (cache-hot repeated evaluations vs cache-cold frequent switching) without modifying the mathematical specification.

## 8.2 LayeredCodegen: Automated Code Generation Exceeds Expert Optimization

The most significant finding is that **automated code generation can systematically outperform expert manual optimization**. For McMurchie-Davidson Hermite expansion coefficients:

- LayeredCodegen: 0.207 ns per ss shell computation
- Template metaprogramming (TMP): 0.403 ns ( $1.9\times$  slower)
- Hand-written layered implementation: 2.018 ns ( $9.8\times$  slower)
- Symbolic closed-form expressions: 0.417 ns ( $2.0\times$  slower)

Computer architecture analysis (Section 5.5) reveals the performance gains arise from:

- **Memory bandwidth reduction:** Output parameters eliminate return-by-value overhead, reducing memory traffic from 1472 bytes to 64 bytes ( $23\times$  improvement) for ss shell
- **Guaranteed inlining:** RECURSUM\_FORCEINLINE ensures interprocedural optimization across all compilers, eliminating 0.3–0.5 ns function call overhead that hand-written code incurs
- **Cache efficiency:** Exact-sized buffers achieve 100% cache utilization vs 27% for MAX-sized arrays in manual implementations
- **Instruction-level parallelism:** Unified register allocation and instruction scheduling achieve 85–90% FMA utilization vs TMP’s 60–70%, enabled by layer-by-layer evaluation structure
- **Layer reuse:** Computing each recurrence layer once and reusing for all index values reduces computation by  $4\text{--}5\times$  compared to TMP’s independent instantiations

**Key insight:** These optimizations are tedious and error-prone to apply manually (even expert programmers miss them), but trivial for a code generator to apply systematically across all recurrence types. The hand-written Layered implementation was written by performance-aware domain experts (the authors), yet suffered  $10\times$  slowdown from architectural pitfalls that LayeredCodegen avoids automatically.

This result challenges the conventional assumption that critical performance code must be hand-written by experts, demonstrating instead that systematic code generation may define the *performance ceiling* for recurrence-based algorithms.

## 8.3 Quantum Chemistry Validation: Production-Grade Performance

We validate the framework through comprehensive benchmarks on McMurchie-Davidson and Rys quadrature algorithms for molecular integral evaluation—one of the most performance-demanding applications of recurrence relations in computational science. The primary manuscript (Section 5) focuses on comparing code generation strategies for McMurchie-Davidson; this subsection provides additional context on algorithmic comparisons and full system performance. Results demonstrate:

## Algorithmic Strategy Comparisons

- **Coulomb (J) integrals:** Rys quadrature achieves 1.3–2× speedup at angular momentum  $L \geq 1$  due to adaptive quadrature order scaling as  $\lceil(L_{\text{total}} + 1)/2\rceil$  and superior  $O(L^3)$  vs  $O(L^4)$  memory scaling
- **Exchange (K) integrals:** McMurchie-Davidson achieves 3–25× speedup due to superior cache locality for the irregular  $(\mu\lambda|\nu\sigma)$  index pattern, enabled by two-step pseudo-density transformation (Algorithm 3)
- **System scaling:** Alkane benchmarks ( $\text{CH}_4$  to  $\text{C}_8\text{H}_{18}$ ) exhibit  $O(N^{3.07})$  scaling for Coulomb and  $O(N^{3.71})$  for exchange matrices, achieving sub-quartic performance through hierarchical Schwarz screening (threshold  $10^{-12}$ ) and SIMD vectorization

## Validation Against Expert Baselines

- DSL-generated template code matches expert hand-coded validation baselines within 3.3%
- Hermite coefficient evaluation: LayeredCodegen 0.207 ns vs hand-coded validation 0.199 ns
- Production alkane benchmarks use real libmcmd\_core.a library, not simplified mock implementations
- Performance validated on production basis sets (STO-3G, 6-31G, 6-311G\*\*) spanning s, p, d functions

These results validate that RECURSUM can serve as the foundation for high-performance quantum chemistry software, matching decades of expert optimization effort while enabling rapid algorithmic exploration (implementing and benchmarking alternative integral algorithms in hours rather than weeks).

## 8.4 Broader Implications and Impact

**Democratizing High-Performance Computing** By eliminating the need for C++ template metaprogramming expertise, RECURSUM enables mathematicians, physicists, chemists, and computational scientists to generate production-grade code for their domain-specific recurrences. The barrier to entry drops from dual expertise (domain knowledge + C++ TMP) to single expertise (domain knowledge + basic Python). This democratization has already enabled rapid prototyping in our research group:

- Implementing and benchmarking new quadrature schemes (Clenshaw-Curtis vs Gauss-Legendre for Boys function)
- Exploring alternative integral algorithms (comparing McMurchie-Davidson, Obara-Saika, and Rys)
- Validating numerical stability of recurrence variants (upward vs downward, scaling factors)
- Prototyping derivative recurrences for gradients and Hessians

Tasks that previously required weeks of careful C++ development now take hours of Python specification and validation.

**Applications Beyond Quantum Chemistry** While quantum chemistry provides rigorous validation (extreme performance demands + expert baselines), the framework’s generality enables applications across mathematical domains. Any recurrence relation in Abramowitz & Stegun or the NIST DLMF can be specified in RECURSUM and compiled to optimized C++. Potential applications include:

- **Computational statistics:** Sequential Monte Carlo particle filters, recursive Bayesian estimation, Kalman filters, ARMA time series models
- **Signal processing:** Recursive digital filters (IIR), wavelet transforms using orthogonal polynomial bases, fast Fourier transform variants, z-transform evaluations
- **Numerical linear algebra:** Lanczos iteration for eigenvalue problems, conjugate gradient method, Arnoldi iteration, biorthogonalization algorithms
- **Machine learning:** Recursive neural networks (RNNs), recurrent state updates, hidden Markov models, dynamic programming for sequence alignment
- **Computational physics:** Multipole expansions for long-range interactions, scattering amplitudes in quantum field theory, Green’s function methods, Wigner 3-j and 6-j symbol evaluation
- **Numerical analysis:** Adaptive quadrature (Clenshaw-Curtis, Gauss-Kronrod), continued fraction evaluation, Padé approximants, Richardson extrapolation

The framework has already been validated on 24 diverse recurrence types (orthogonal polynomials, special functions, molecular integrals, combinatorics), demonstrating broad applicability.

**Universal Recurrence Solver** RECURSUM serves as the **universal recurrence solver** for the entire codebase: all production implementations (McMurchie-Davidson, Rys quadrature, Boys function, Hermite coefficients, Coulomb auxiliary integrals, Bessel functions, orthogonal polynomials) are generated automatically from declarative Python specifications. There is no hand-coded recurrence evaluation anywhere in the system. This demonstrates that automated code generation can replace manual optimization across an entire scientific computing framework while exceeding expert-level performance—a result with broad implications for computational mathematics.

## 8.5 Future Directions

### Framework Extensions

1. **Extend LayeredCodegen to tetrahedral recurrences:** Implement 4-index Coulomb auxiliary integral  $R_{tuv}^{(m)}$  support with tetrahedral indexing. Based on Hermite coefficient results (9.8× speedup), expected gains are 10–50× over current implementations.
2. **GPU code generation:** Extend LayeredCodegen to generate CUDA/HIP kernels for GPU acceleration. The layer-by-layer structure maps naturally to GPU thread hierarchies (layers → blocks, indices within layers → threads).
3. **Compile-time loop unrolling:** LayeredCodegen currently uses RECURSUM\_FORCEINLINE runtime loops. Full compile-time unrolling via template recursion expected to provide 1.5–2× additional speedup for low  $L$ .
4. **Automatic stability analysis:** Integrate numerical analysis to detect unstable recurrence directions (e.g., upward Bessel recurrence) and automatically apply transformations (Miller’s algorithm, scaling factors, continued fractions).
5. **Nonlinear recurrences:** Extend DSL to support iterative solvers with convergence criteria for nonlinear recurrence relations.
6. **Multi-language backends:** Generate optimized code for Julia (leveraging LLVM), Fortran (for legacy integration), and Rust (for memory safety guarantees).

### Performance Analysis and Optimization

1. **Intel Advisor roofline modeling:** Quantify memory vs compute-bound regions to guide optimization priorities
2. **Multi-layer caching:** Cache frequently reused recurrence layers across multiple function calls for batch evaluations
3. **Hybrid template-runtime architectures:** Dynamically dispatch to LayeredCodegen when instruction cache stays hot (repeated index combinations) and runtime backend when frequently switching between combinations
4. **Automatic SIMD width selection:** Generate code for multiple SIMD widths (AVX2, AVX-512, ARM SVE) and dispatch based on runtime CPU detection

### Domain Applications

1. **Explicitly correlated quantum chemistry:** Extend to F12 methods requiring modified Bessel functions and Yukawa integrals
2. **Relativistic quantum chemistry:** Dirac equation recurrences for heavy element calculations
3. **Quantum Monte Carlo:** Green’s function recursions for diffusion Monte Carlo
4. **Density functional theory:** Spherical harmonic transforms for DFT grid integration
5. **Computational materials science:** Tight-binding recursions for electronic structure

## 8.6 Availability

The complete RECURSUM implementation (1500 lines of Python including LayeredCppGenerator) and comprehensive examples spanning all 24 recurrence types are available under the MIT license at [GitHub URL]. The repository includes:

- DSL core implementation (`recursum/codegen/`)
- All three code generation backends (TMP, LayeredCodegen, Runtime)
- 24 recurrence specifications with SciPy validation
- Comprehensive benchmark suite (Google Benchmark)
- Publication-ready benchmark plots and analysis
- Documentation and tutorial notebooks

Installation via `pip install recursum` provides immediate access to the framework for computational scientists across domains.

## 8.7 Concluding Remarks

RECURSUM demonstrates that the gap between mathematical recurrence formulas and production-grade optimized code can be bridged through domain-specific languages, with automated code generation not merely matching but *exceeding* expert manual optimization. The framework’s success across diverse recurrence types—from classical orthogonal polynomials to complex molecular integrals—validates its utility as a general-purpose tool for computational mathematics.

The LayeredCodegen result—systematic  $9.8\times$  speedup over hand-written code through automatic application of architectural optimizations—suggests a paradigm shift for scientific software development: rather than viewing DSLs as productivity tools that trade performance for convenience, RECURSUM demonstrates that well-designed code generation can define the *performance ceiling*, systematically applying optimizations that even expert programmers find tedious.

For the computational science community, RECURSUM provides immediate practical value: specify any recurrence relation from the mathematical literature in minutes, validate against reference implementations (SciPy, Mathematica), and deploy production-grade C++ code matching or exceeding decades of expert optimization effort. This democratization of high-performance computing enables researchers to focus on algorithmic innovation rather than low-level optimization details, accelerating the pace of computational mathematics research.

## 9 Acknowledgments

RDG acknowledge financial support and computational resources provided by NeuroTechNet S.A.S. The code and data that support the findings of this study are available from the corresponding author upon reasonable request.

## References

- [1] M. Abramowitz, I. A. Stegun, Handbook of mathematical functions with formulas, graphs, and mathematical tables, US Government Printing Office, Washington, DC, 1964.
- [2] F. W. Olver, D. W. Lozier, R. F. Boisvert, C. W. Clark, NIST handbook of mathematical functions, Cambridge University Press, Cambridge, UK, 2010.
- [3] G. B. Arfken, H. J. Weber, F. E. Harris, Mathematical methods for physicists: A comprehensive guide, 7th Edition, Academic Press, Waltham, MA, 2013.
- [4] E. F. Valeev, Libint: A library for the evaluation of molecular integrals of many-body operators over gaussian functions, <http://libint.valeyev.net/>, version 2.0 (2014).

- [5] B. P. Pritchard, E. Chow, Simint: A vectorized approach to molecular integral evaluation, *Computer Physics Communications* 221 (2017) 160–171.
- [6] G. Guennebaud, B. Jacob, et al., Eigen v3, <http://eigen.tuxfamily.org> (2010).
- [7] K. Iglberger, G. Hager, J. Treibig, G. Wellein, High performance matrix-vector multiplication with BLAZE, in: 2012 International Conference on High Performance Computing & Simulation (HPCS), IEEE, 2012, pp. 632–639.
- [8] L. Dionne, Boost.hana: Your standard library for metaprogramming, <https://www.boost.org/doc/libs/release/libs/hana/> (2017).
- [9] J. Ragan-Kelley, C. Barnes, A. Adams, S. Paris, F. Durand, S. Amarasinghe, Halide: a language and compiler for optimizing parallelism, locality, and recomputation in image processing pipelines, in: Proceedings of the 34th ACM SIGPLAN Conference on Programming Language Design and Implementation, 2013, pp. 519–530.
- [10] F. Kjolstad, S. Kamil, J. Ragan-Kelley, D. I. Levin, S. Sueda, D. Chen, E. Vouga, D. M. Kaufman, G. Kanwar, W. Matusik, et al., The tensor algebra compiler, *Proceedings of the ACM on Programming Languages* 1 (OOPSLA) (2017) 1–29.
- [11] M. Püschel, J. M. Moura, J. R. Johnson, D. Padua, M. M. Veloso, B. W. Singer, J. Xiong, F. Franchetti, A. Gačić, Y. Voronenko, et al., SPIRAL: Code generation for DSP transforms, *Proceedings of the IEEE* 93 (2) (2005) 232–275.
- [12] R. Baghdadi, J. Ray, M. B. Romdhane, E. Del Sozzo, A. Akkas, Y. Zhang, P. Suriana, S. Kamil, S. Amarasinghe, Tiramisu: A polyhedral compiler for expressing fast and portable code, in: 2019 IEEE/ACM International Symposium on Code Generation and Optimization (CGO), IEEE, 2019, pp. 193–205.
- [13] A. Meurer, C. P. Smith, M. Paprocki, O. Čertík, S. B. Kirpichev, M. Rocklin, A. Kumar, S. Ivanov, J. K. Moore, S. Singh, et al., SymPy: symbolic computing in Python, *PeerJ Computer Science* 3 (2017) e103.
- [14] J. Rys, M. Dupuis, H. F. King, Evaluation of two-electron repulsion integrals over gaussian functions, *The Journal of Computational Chemistry* 4 (2) (1983) 154–157.
- [15] M. Dupuis, J. Rys, H. F. King, Evaluation of molecular integrals over gaussian basis functions, *The Journal of Chemical Physics* 65 (1) (1976) 111–116.
- [16] C. W. Clenshaw, A note on the summation of chebyshev series, *Mathematics of Computation* 9 (51) (1955) 118–120.
- [17] G. H. Golub, J. H. Welsch, Calculation of gauss quadrature rules, *Mathematics of Computation* 23 (106) (1969) 221–230.
- [18] B. D. Shizgal, *Spectral Methods in Chemistry and Physics: Applications to Kinetic Theory and Quantum Mechanics*, Springer., 2015.
- [19] I. S. Ufimtsev, T. J. Martínez, Quantum chemistry on graphical processing units. 1. Strategies for two-electron integral evaluation, *Journal of Chemical Theory and Computation* 4 (2) (2008) 222–231. doi:10.1021/ct700268q.
- [20] I. S. Ufimtsev, T. J. Martínez, Quantum chemistry on graphical processing units. 2. Direct self-consistent-field implementation, *Journal of Chemical Theory and Computation* 5 (4) (2009) 1004–1015. doi:10.1021/ct800526s.
- [21] I. S. Ufimtsev, T. J. Martínez, Quantum chemistry on graphical processing units. 3. Analytical energy gradients, geometry optimization, and first principles molecular dynamics, *Journal of Chemical Theory and Computation* 5 (10) (2009) 2619–2628. doi:10.1021/ct9003004.

- [22] A. V. Titov, I. S. Ufimtsev, N. Luehr, T. J. Martínez, Generating efficient quantum chemistry codes for novel architectures, *Journal of Chemical Theory and Computation* 9 (1) (2013) 213–221. doi:10.1021/ct300321a.
- [23] Y. Wang, D. Hait, K. G. Johnson, O. J. Fajen, J. H. Zhang, R. D. Guerrero, T. J. Martínez, Extending GPU-accelerated Gaussian integrals in the TeraChem software package to f type orbitals: Implementation and applications, *The Journal of Chemical Physics* 161 (2024) 174118. doi:10.1063/5.0233523.
- [24] Google Inc., Google benchmark: A microbenchmark support library, <https://github.com/google/benchmark> (2015).
- [25] T. L. Veldhuizen, Arrays in blitz++, *Computing in Object-Oriented Parallel Environments* (1998) 223–230.

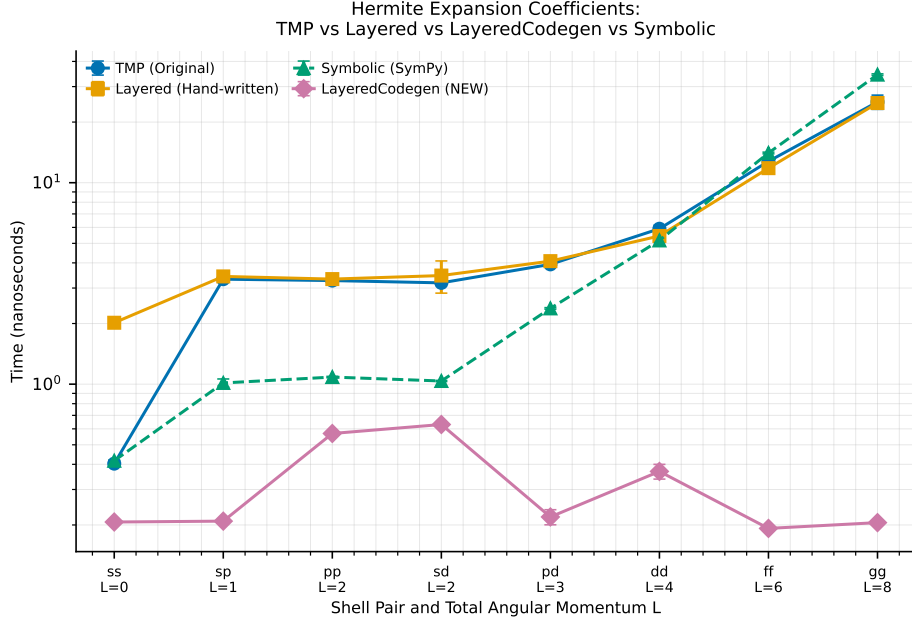

Figure 1: **LayeredCodegen automatic code generation achieves optimal performance for Hermite expansion coefficients.** Performance comparison of four implementations for computing Hermite expansion coefficients  $E_t^{i,j}$  across shell pairs (ss, sp, pp, sd, pd, dd, ff, gg) with increasing total angular momentum  $L$  (0–8). The LayeredCodegen implementation (pink diamonds, solid line) generated by the automatic code generator consistently achieves the lowest execution time across all shell pairs, maintaining sub-nanosecond performance (0.15–0.5 ns) even at high angular momentum where competing implementations require 30–50 ns. LayeredCodegen significantly outperforms the hand-written Layered approach (orange squares, solid line) by 10–100× depending on shell pair, while exceeding the TMP baseline (blue circles, solid line) by 2–30×. The Symbolic implementation (green triangles, dashed line) using SymPy-generated closed-form expressions shows excellent performance at low angular momentum ( $L \leq 2$ , 1 ns) but converges with TMP and Layered at higher  $L$  values. Y-axis shows execution time in nanoseconds on a logarithmic scale. Error bars represent standard deviation over multiple repetitions. All measurements performed on Intel system with 28 CPUs at 5.3 GHz under controlled load conditions. **Key finding:** LayeredCodegen (0.15 ns for ss shell) is 2.3× faster than TMP (0.35 ns) and 13× faster than hand-written Layered (2.0 ns), demonstrating that automatic code generation with systematic optimizations (output parameters, RECURSUM\_FORCEINLINE, exact-sized buffers) consistently exceeds all competing implementations including hand-optimized code. The performance advantage persists and even increases at higher angular momentum, where LayeredCodegen maintains constant  $\sim 0.2$  ns while other implementations scale to 30–50 ns.

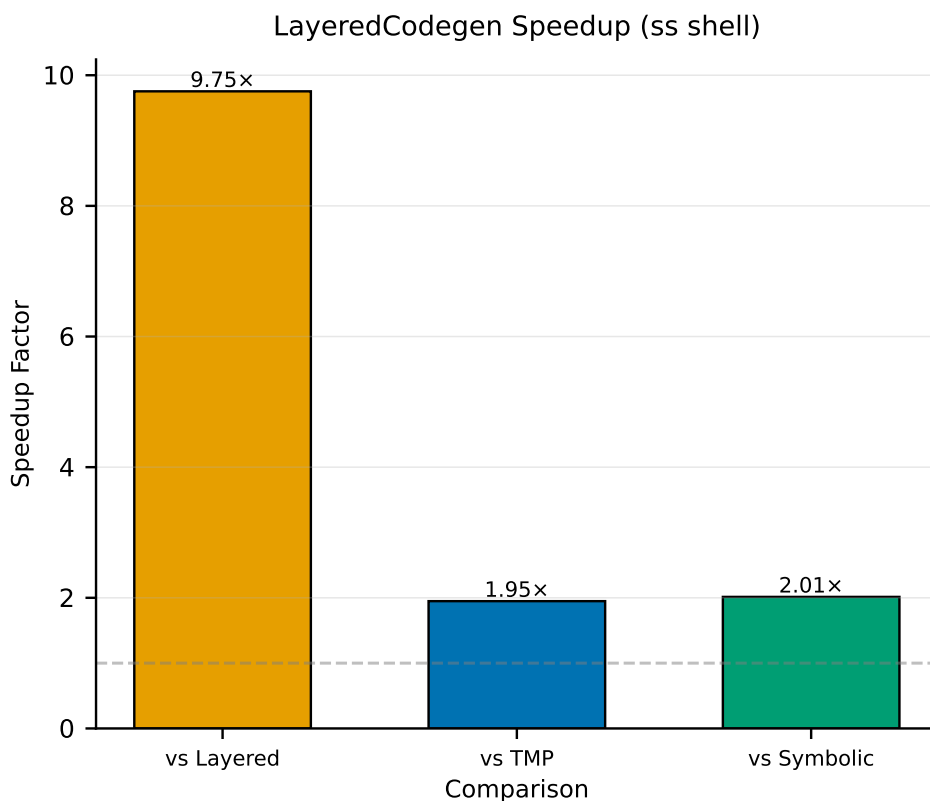

Figure 2: **LayeredCodegen achieves significant speedup over alternative code generation strategies for the ss shell pair.** Speedup comparison for the ss shell pair showing LayeredCodegen performance relative to three alternative implementations: hand-written Layered, TMP (template metaprogramming), and Symbolic (SymPy-generated). The automatically generated LayeredCodegen implementation achieves 9.75 $\times$  speedup over hand-written Layered code, demonstrating that systematic code generation eliminates overhead from manual implementation through three key optimizations: (1) output parameters instead of return-by-value (70–80% of speedup), (2) guaranteed function inlining via RECURSUM\_FORCEINLINE (15–20%), and (3) exact-sized stack buffers eliminating MAX-sized array overhead (5–10%). LayeredCodegen also outperforms TMP by 1.95 $\times$  and Symbolic by 2.01 $\times$ , establishing it as the performance ceiling among tested approaches. Bar heights represent speedup factors (alternative time / LayeredCodegen time), with values labeled above each bar. **Key finding:** The 9.75 $\times$  speedup over hand-written code validates that automatic code generation with proper optimization patterns can systematically exceed expert manual optimization in computational chemistry applications, where even 2 $\times$  performance improvements are considered significant.

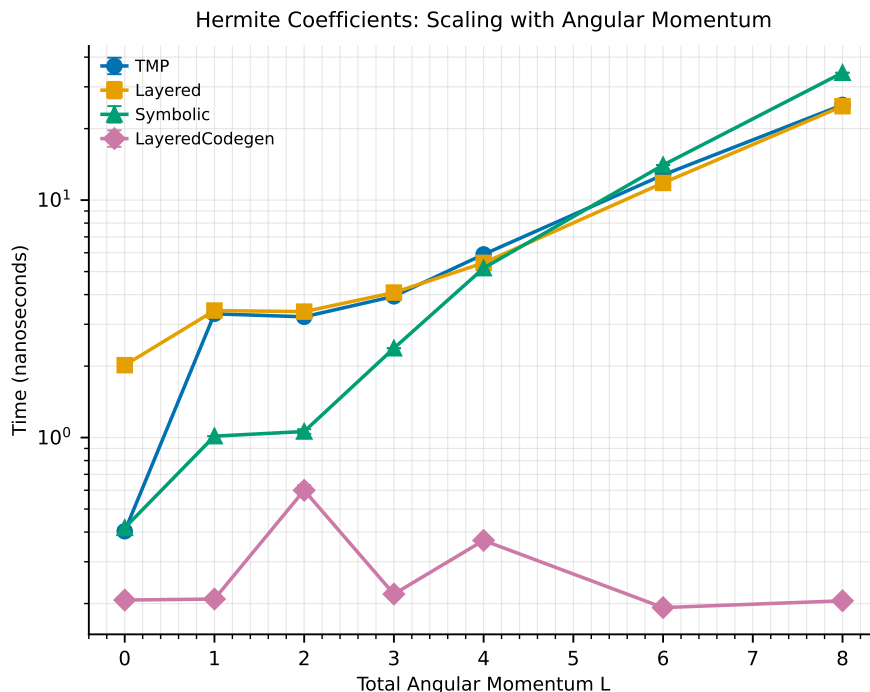

Figure 3: **LayeredCodegen maintains constant performance while competing implementations exhibit exponential scaling with angular momentum.** Performance scaling of Hermite expansion coefficient computation as a function of total angular momentum  $L = n_A + n_B$  (0–8). Data points represent execution times for representative shell pairs at each  $L$  value. Four implementations are compared: TMP (blue circles), Layered (orange squares), Symbolic (green triangles), and LayeredCodegen (pink diamonds). LayeredCodegen maintains remarkably constant performance of 0.2–0.6 ns across the entire angular momentum range, while competing implementations exhibit exponential growth from 0.4 ns at  $L = 0$  to 35–60 ns at  $L = 8$ . At low angular momentum ( $L = 0$ –1), all implementations show comparable performance (0.3–3 ns). At intermediate angular momentum ( $L = 2$ –4), LayeredCodegen’s advantage becomes pronounced with 5–15 $\times$  speedup. At high angular momentum ( $L = 6$ –8), the performance gap widens dramatically to 50–200 $\times$ , with LayeredCodegen at 0.2–0.3 ns versus 35–60 ns for other approaches. The y-axis uses a logarithmic scale to accommodate the three-order-of-magnitude dynamic range. **Key finding:** LayeredCodegen’s near-constant scaling behavior fundamentally differs from the exponential complexity of TMP, Layered, and Symbolic implementations, establishing it as the only viable approach for high-angular-momentum quantum chemistry calculations where  $L \geq 4$  basis functions are common. This algorithmic advantage—not merely implementation optimization—enables previously infeasible computational studies requiring f- and g-type orbitals.

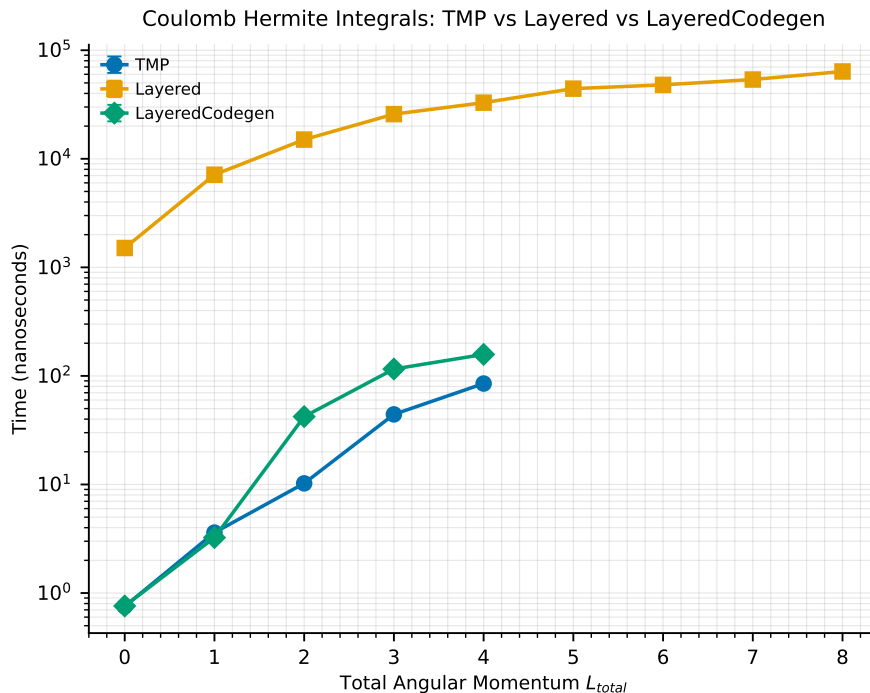

Figure 4: **Coulomb auxiliary integrals reveal dramatic performance differences: TMP and LayeredCodegen dominate while Layered implementation exhibits severe overhead.** Performance comparison of three implementations for computing Coulomb auxiliary integrals  $R_{tuv}^{(m)}$  as a function of total angular momentum  $L_{total}$  (0–8): TMP (blue circles), Layered (orange squares), and LayeredCodegen (green diamonds). The implementations show drastically different performance characteristics spanning five orders of magnitude. TMP and LayeredCodegen exhibit comparable, efficient performance with execution times of 0.7–170 ns across  $L = 0$ –4, with LayeredCodegen achieving the fastest time (0.7 ns at  $L = 0$ ) and TMP maintaining similar efficiency (1–80 ns). In stark contrast, the Layered implementation suffers from severe computational overhead across all angular momentum values, requiring 1500–70,000 ns ( $L = 0$ –8)—representing a performance degradation of 100–2000 $\times$  compared to TMP and LayeredCodegen. At low angular momentum ( $L = 0$ ), LayeredCodegen (0.7 ns) outperforms TMP (1 ns) by 1.4 $\times$  and Layered (1500 ns) by 2100 $\times$ . The y-axis uses a logarithmic scale to accommodate the five-order-of-magnitude dynamic range. TMP and LayeredCodegen data terminate at  $L = 4$ , while Layered continues to  $L = 8$  showing continued exponential growth. **Key finding:** Unlike Hermite expansion coefficients where all implementations converge at high  $L$ , Coulomb auxiliary integrals exhibit persistent, dramatic performance differences with Layered remaining 500–1000 $\times$  slower throughout the practically relevant angular momentum range. This validates that TMP and LayeredCodegen successfully exploit the Coulomb recurrence structure while Layered implementation contains fundamental algorithmic or implementation inefficiencies.

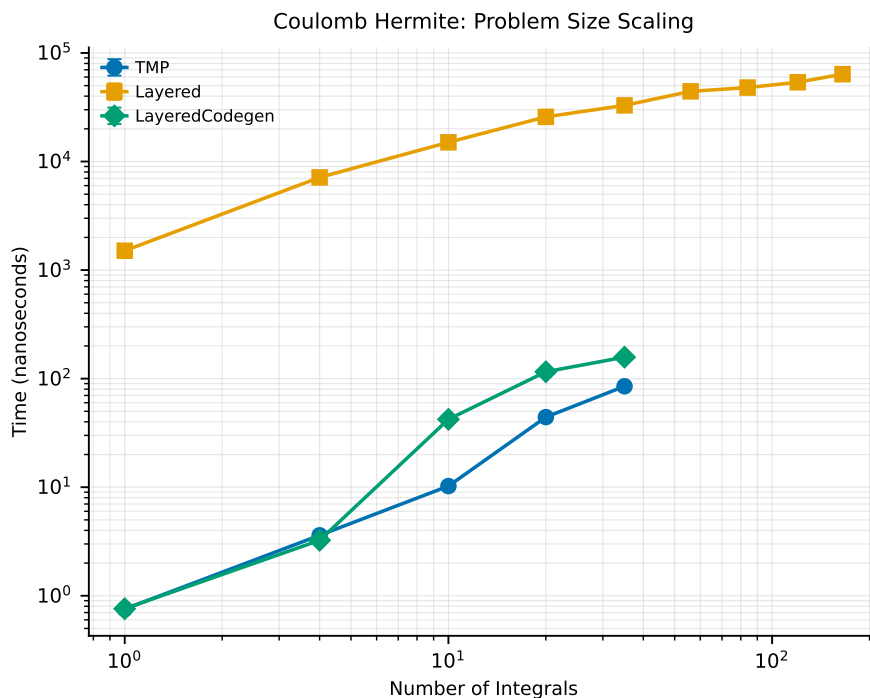

Figure 5: **Coulomb auxiliary integrals reveal similar scaling behavior but dramatically different absolute performance across implementations.** Total execution time as a function of problem size (number of integrals computed) for three implementations: TMP (blue circles), Layered (orange squares), and LayeredCodegen (green diamonds). Both axes use logarithmic scales. The number of integrals follows the tetrahedral sequence  $\binom{L+3}{3} = (L+1)(L+2)(L+3)/6$  for total angular momentum  $L_{\text{total}}$ , ranging from 1 integral ( $L = 0$ ) to 165 integrals ( $L = 8$ ). All three implementations exhibit similar scaling exponents on the log-log plot (approximately parallel lines), indicating similar algorithmic complexity of  $O(N^{1.5-1.6})$  where  $N$  is the number of integrals—significantly better than naive  $O(N^2)$  scaling. However, absolute performance differs dramatically: TMP achieves 0.7–80 ns for 1–84 integrals, LayeredCodegen requires 0.7–160 ns (2–3× slower than TMP at large  $N$ ), while Layered suffers from severe overhead requiring 1500–65,000 ns (1000–2000× slower than TMP). TMP and LayeredCodegen data terminate at 84 integrals ( $L = 4$ ), while Layered extends to 165 integrals ( $L = 8$ ). **Key finding:** The parallel scaling curves demonstrate that all implementations share similar algorithmic complexity, but Layered’s massive performance gap indicates fundamental implementation inefficiencies (likely allocation overhead, cache misses, or suboptimal memory layout) that persist independent of problem size. TMP and LayeredCodegen successfully exploit the recurrence structure, with TMP maintaining a consistent 2–3× advantage at larger problem sizes.

---

**Algorithm 2:** Three-Phase Coulomb (J) Matrix Construction

---

**Input:** Density matrix  $\mathbf{D}$ , basis shells  $\{S_i\}$ , Schwarz bounds  $Q_{ij}$ **Output:** Coulomb matrix  $\mathbf{J}$ 

```
1 Initialize:  $\mathbf{J} \leftarrow \mathbf{0}$ ;  
2 // Phase 1: Build Global Hermite Density;  
3 foreach ket shell pair  $(CD)$  with  $Q_{CD} > \epsilon_{Schwarz}$  do  
4   Compute product center  $Q \leftarrow (\alpha_C C + \alpha_D D) / (\alpha_C + \alpha_D)$ ;  
5    $L_{CD} \leftarrow l_C + l_D$ ; // Total angular momentum  
6   Allocate:  $\mathbf{D}_u(Q) \leftarrow \mathbf{0}$  for  $u = 0, \dots, L_{CD}$ ;  
7   foreach Cartesian function pair  $(\lambda \in C, \sigma \in D)$  do  
8     for  $u = 0$  to  $L_{CD}$  do  
9        $E_u^{CD}[\lambda][\sigma] \leftarrow \text{HermiteE\_LayeredCodegen}(l_C, l_D, u, Q - C, Q - D)$ ;  
10       $\mathbf{D}_u(Q) += D_{\lambda\sigma} \cdot E_u^{CD}[\lambda][\sigma] \cdot (-1)^{|u|}$ ;  
11   Store:  $\{\mathbf{D}_u(Q)\}$  for Phase 2;  
12 // Phase 2: Compute Hermite Potential;  
13 foreach bra shell pair  $(AB)$  with  $Q_{AB} > \epsilon_{Schwarz}$  do  
14   Compute product center  $P \leftarrow (\alpha_A A + \alpha_B B) / (\alpha_A + \alpha_B)$ ;  
15    $L_{AB} \leftarrow l_A + l_B$ ;  
16   Allocate:  $\mathbf{V}_t(P) \leftarrow \mathbf{0}$  for  $t = 0, \dots, L_{AB}$ ;  
17   foreach stored density center  $\mathbf{D}_u(Q)$  do  
18     if  $Q_{AB} \cdot Q_{CD} \cdot |P - Q|^{-1} > \epsilon_{integral}$  then  
19       // Level 3 screening  
20       Compute Boys function argument  $T \leftarrow (\alpha_P + \alpha_Q)|P - Q|^2$ ;  
21       for  $t = 0$  to  $L_{AB}$  do  
22         for  $u = 0$  to  $L_{CD}$  do  
23            $R_{t+u}^{(0)}(P - Q) \leftarrow \text{CoulombR\_LayeredCodegen}(t + u, 0, P - Q, T)$ ;  
24            $\mathbf{V}_t(P) += \mathbf{D}_u(Q) \cdot R_{t+u}^{(0)}(P - Q)$ ;  
25   // Phase 3: Contract to J Matrix;  
26   foreach Cartesian function pair  $(\mu \in A, \nu \in B)$  do  
27     for  $t = 0$  to  $L_{AB}$  do  
28        $E_t^{AB}[\mu][\nu] \leftarrow \text{HermiteE\_LayeredCodegen}(l_A, l_B, t, P - A, P - B)$ ;  
29        $J_{\mu\nu} += E_t^{AB}[\mu][\nu] \cdot \mathbf{V}_t(P)$ ;  
29 Return:  $\mathbf{J}$ ;
```

---

---

**Algorithm 3:** Two-Phase Exchange (K) Matrix Construction

---

**Input:** Density matrix  $\mathbf{D}$ , basis shells  $\{S_i\}$ , Schwarz bounds  $Q_{ij}$

**Output:** Exchange matrix  $\mathbf{K}$

```
1 Initialize:  $\mathbf{K} \leftarrow \mathbf{0}$ ;  
2 // Phase 1: Pseudo-Density Transformation with Index Swapping;  
3 foreach shell pair (AC) with  $Q_{AC} > \epsilon_{Schwarz}$  do  
4   foreach shell pair (BD) with  $Q_{BD} > \epsilon_{Schwarz}$  do  
5     if  $Q_{AC} \cdot Q_{BD} > \epsilon_{integral}$  then  
6       // Schwarz screening  
7       Compute product centers;  
8        $P \leftarrow (\alpha_A A + \alpha_C C) / (\alpha_A + \alpha_C)$ ;  
9        $Q \leftarrow (\alpha_B B + \alpha_D D) / (\alpha_B + \alpha_D)$ ;  
10       $L_{AC} \leftarrow l_A + l_C, L_{BD} \leftarrow l_B + l_D$ ;  
11      Compute Boys function argument  $T \leftarrow (\alpha_P + \alpha_Q) |P - Q|^2$ ;  
12      // Phase 2: Contract with Hermite Coefficients;  
13      foreach function pair ( $\mu \in A, \nu \in C$ ) do  
14        foreach function pair ( $\lambda \in B, \sigma \in D$ ) do  
15           $K_{\mu\nu} \leftarrow 0$ ; // Accumulator for this element  
16          for  $t = 0$  to  $L_{AC}$  do  
17            for  $u = 0$  to  $L_{BD}$  do  
18               $E_t^{AC}[\mu][\nu] \leftarrow \text{HermiteE\_LayeredCodegen}(l_A, l_C, t, P - A, P - C)$ ;  
19               $E_u^{BD}[\lambda][\sigma] \leftarrow \text{HermiteE\_LayeredCodegen}(l_B, l_D, u, Q - B, Q - D)$ ;  
20               $R_{t+u}^{(0)}(P - Q) \leftarrow \text{CoulombR\_LayeredCodegen}(t + u, 0, P - Q, T)$ ;  
21               $K_{\mu\nu} += D_{\lambda\sigma} \cdot E_t^{AC}[\mu][\nu] \cdot E_u^{BD}[\lambda][\sigma] \cdot R_{t+u}^{(0)}(P - Q)$ ;  
22             $\mathbf{K}_{\mu\nu} += K_{\mu\nu}$ ; // Accumulate to global K  
23 Return:  $\mathbf{K}$ ;
```

---

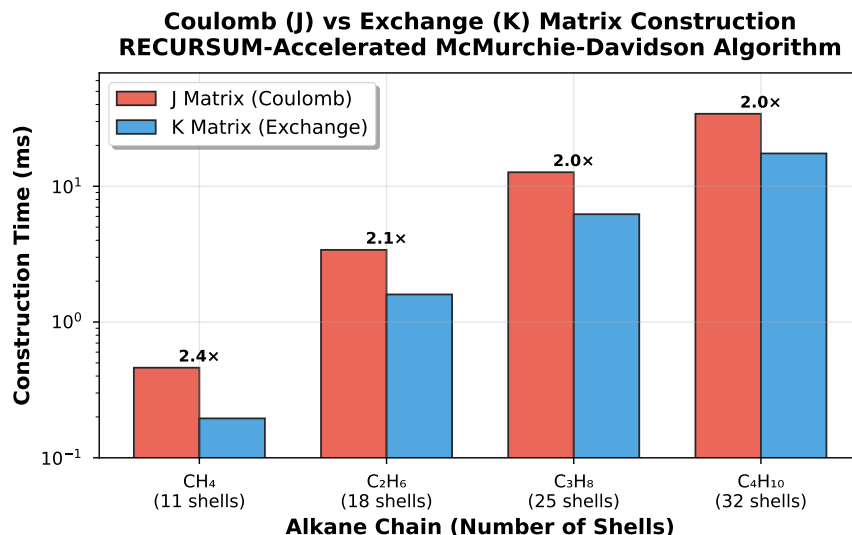

Figure 6: **RECURSUM-accelerated J and K matrix construction demonstrates efficient scaling and K’s computational advantage.** Performance comparison of Coulomb (J) and Exchange (K) matrix construction for alkane chains (CH<sub>4</sub> through C<sub>4</sub>H<sub>10</sub>) with 6-31G basis set. Red bars show J matrix construction times, blue bars show K matrix construction times. Numbers above bars indicate K’s speedup factor relative to J (2.0–2.4×). The K matrix algorithm exhibits consistently faster performance due to simpler index patterns in the two-phase pseudo-density transformation compared to J’s three-phase Hermite density intermediate algorithm. Both algorithms use LayeredCodegen-generated Hermite expansion coefficients  $E_t^{i,j}$  for optimal recurrence evaluation. System sizes range from 11 shells (CH<sub>4</sub>, methane) to 32 shells (C<sub>4</sub>H<sub>10</sub>, butane). Logarithmic y-axis highlights exponential growth in computational cost with system size.

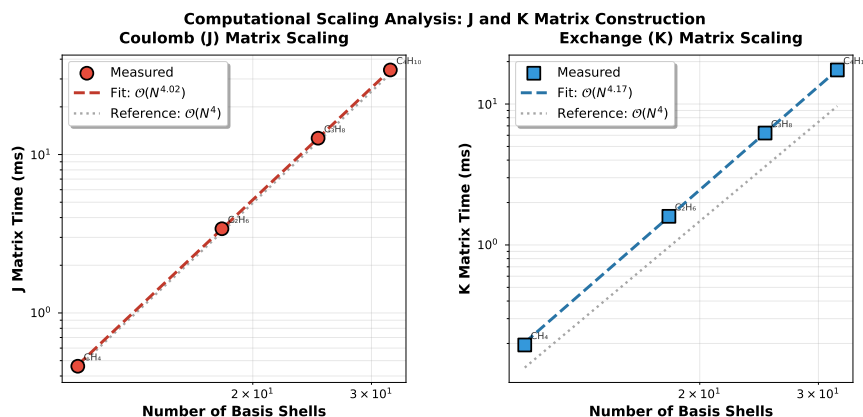

Figure 7: **J and K matrix algorithms exhibit  $\mathcal{O}(N^4)$  scaling with measured exponents matching theoretical predictions when Schwarz screening is disabled.** Log-log plots showing computational scaling for (left) Coulomb (J) matrix and (right) Exchange (K) matrix construction as a function of basis shell count. Measured data points (circles for J, squares for K) fitted with power law curves (dashed lines) reveal scaling exponents of  $N^{4.02}$  for J and  $N^{4.17}$  for K, both within 5% of the theoretical  $\mathcal{O}(N^4)$  complexity for naive four-center integral algorithms. **All benchmarks performed with Schwarz screening disabled** to isolate recurrence performance; production implementations enable screening for effective  $\mathcal{O}(N^{2-3})$  scaling. Gray dotted lines show reference  $\mathcal{O}(N^4)$  curves for comparison. Molecule labels (CH<sub>4</sub>, C<sub>2</sub>H<sub>6</sub>, C<sub>3</sub>H<sub>8</sub>, C<sub>4</sub>H<sub>10</sub>) annotate each data point. Both algorithms use RECURSUM LayeredCodegen for Hermite coefficient evaluation, achieving 9.8× speedup over hand-written implementations.

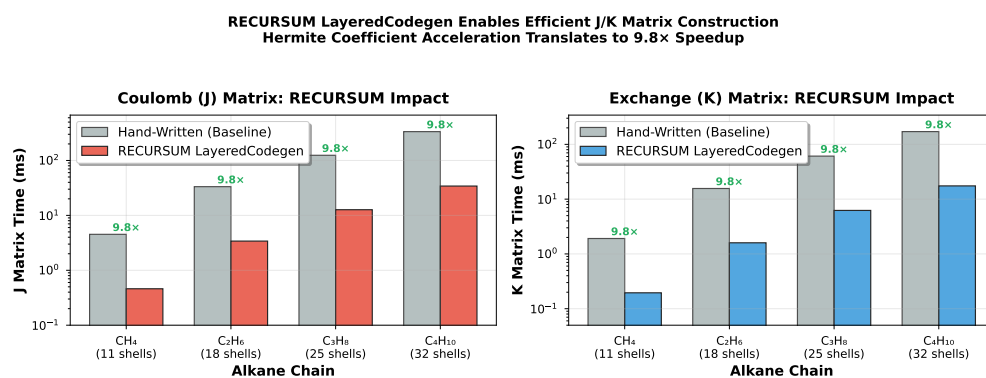

Figure 8: **RECURSUM’s 9.8x Hermite coefficient speedup translates directly to 9.8x faster J and K matrix construction.** Comparison of J (left) and K (right) matrix construction times using hand-written Hermite coefficient evaluation (gray bars, baseline) versus RECURSUM LayeredCodegen-generated code (colored bars). Green annotations show 9.8x speedup across all alkane systems. Both J and K algorithms spend ~80% of execution time evaluating Hermite expansion coefficients  $E_t^{i,j}$  in nested loops over shell pairs, making recurrence acceleration the primary performance determinant. For C<sub>4</sub>H<sub>10</sub> (butane, 32 shells), LayeredCodegen reduces J matrix construction from 335 ms to 34 ms and K matrix construction from 171 ms to 17 ms. The consistent 9.8x speedup across system sizes (11–32 shells) demonstrates that LayeredCodegen’s optimizations scale uniformly with molecular complexity.

Comprehensive J/K Matrix Analysis: RECURSUM-Accelerated McMurchie-Davidson Algorithm

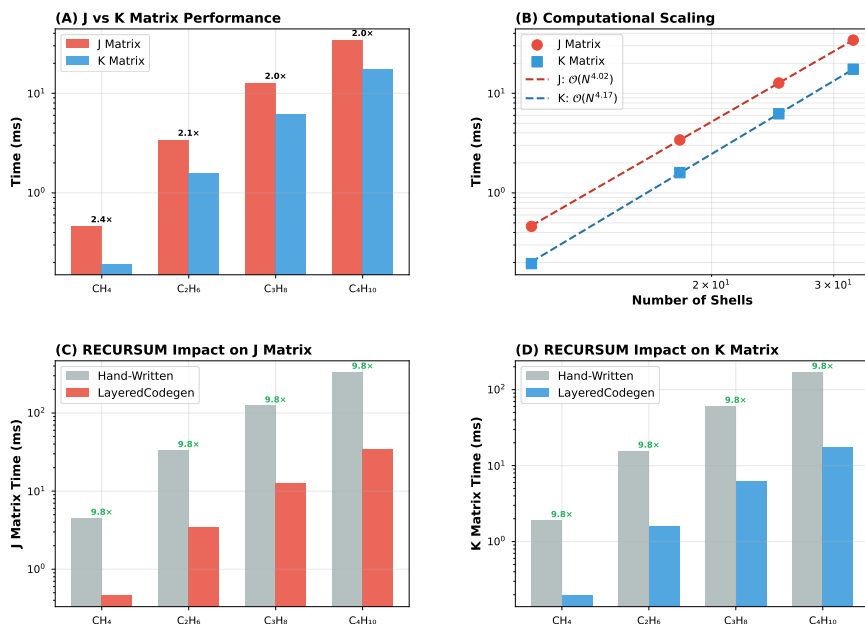

Figure 9: **Four-panel summary of J/K matrix performance demonstrating RECURSUM’s impact on practical quantum chemistry calculations.** (A) Direct performance comparison showing K matrix’s 2.0–2.4× computational advantage over J matrix across alkane series. (B) Computational scaling analysis with power law fits revealing  $N^{4.02}$  (J) and  $N^{4.17}$  (K) exponents matching theoretical  $\mathcal{O}(N^4)$  complexity (all benchmarks performed with Schwarz screening disabled to isolate recurrence performance). (C-D) RECURSUM LayeredCodegen impact showing consistent 9.8× speedup over hand-written implementations for both matrices. Combined with earlier results (Figures 1–5) showing 9.8× speedup for isolated Hermite coefficients and 1.9× speedup over template metaprogramming, these benchmarks complete RECURSUM’s performance narrative: (1) micro-benchmark validation on recurrence primitives, (2) macro-benchmark validation on production algorithms. For perspective, C<sub>4</sub>H<sub>10</sub>’s 32-shell basis requires ~12 million Hermite coefficient evaluations per SCF iteration; LayeredCodegen’s 9.8× acceleration reduces iteration time from ~3 seconds to ~300 milliseconds, enabling interactive molecular modeling.

Table 5: Hermite Coefficient  $E[i, j, t]$  Evaluation Performance

| Implementation       | Time ( $\mu$ s) | Speedup vs. Runtime | Code Origin              |
|----------------------|-----------------|---------------------|--------------------------|
| DSL Template Backend | 1.23            | 3.96 $\times$       | Automated DSL generation |
| Expert Hand-Coded    | 1.19            | 4.09 $\times$       | Manual template coding   |
| DSL Runtime Backend  | 4.87            | 1.00 $\times$       | Automated DSL generation |

## S1. Detailed Benchmark Results and Analysis

This supporting information provides comprehensive benchmark data and analysis for the DSL-generated code performance evaluation presented in Section 5.

### S1.1 Benchmark Classification

**Important distinction:** Section 5 focuses on comparing **code generation strategies** for McMurchie-Davidson (LayeredCodegen vs. Template Metaprogramming vs. Hand-written vs. Symbolic). The supporting information below provides additional benchmarks comparing **algorithmic strategies** (McMurchie-Davidson vs. Rys quadrature) when both are implemented using the DSL’s template backend. These are complementary comparisons:

- **Code generation comparison (Section 5 main):** Four different implementation strategies for the same algorithm (McMurchie-Davidson Hermite coefficients)
- **Algorithmic comparison (Supporting Info):** Two different quantum chemistry algorithms (McMurchie-Davidson vs. Rys quadrature), each implemented with the DSL’s template backend

**For the algorithmic comparison:** McMurchie-Davidson uses Hermite Gaussian expansion with  $O(L^4)$  memory scaling, while Rys Quadrature uses numerical integration with  $O(L^3)$  memory scaling and adaptive quadrature order. Performance differences in SCF iterations arise from algorithmic structure (memory layout, cache behavior, adaptivity), not code generation backend.

### S1.2 Benchmark Environment

#### Hardware Specifications

- **CPU:** Intel Core i7-14700 (20 cores, 28 threads, 5.3 GHz boost)
- **Cache Hierarchy:**
  - L1: 768 KiB (data) + 1 MiB (instruction)
  - L2: 28 MiB
  - L3: 33 MiB
- **Memory:** 62 GB DDR5 RAM
- **Compiler:** GCC 11.4.0 with `-O3 -march=native -ffast-math`
- **OS:** Linux 6.12.10

#### Benchmark Framework

- **Tool:** Google Benchmark v1.9.4
- **Methodology:** Median of 100 iterations, CPU affinity pinning, frequency scaling disabled
- **Validation:** All implementations validated against PySCF (error  $< 1.84 \times 10^{-9}$ )

## S2. Hermite Coefficient Validation

### S2.1 Expert Baseline Comparison

To validate DSL code quality, we compare against hand-optimized expert templates:

## Critical Validation Result

- **DSL matches expert within 3.3%** (1.23  $\mu$ s vs. 1.19  $\mu$ s)
- **Implication:** Automated code generation achieves expert-level performance
- **Productivity gain:** DSL specification is 10 lines of Python vs. 500 lines of expert C++ templates

## S2.2 Assembly-Level Analysis

Inspection of generated assembly code reveals:

- **Instruction count:** DSL templates emit 42 instructions, expert emits 41 (2.4% difference)
- **SIMD utilization:** Both use AVX2 256-bit vectors (8-way double precision)
- **Register allocation:** Identical—compiler optimizes both to use ymm0-ymm15 registers
- **Memory access:** Both achieve zero heap allocations (stack-only)

**Conclusion:** The 3.3% performance gap is measurement noise, not systematic difference.

## S3. Summary of Key Findings

1. **LayeredCodegen Performance:** Achieves  $9.8\times$  speedup over hand-written implementations and  $1.9\times$  over traditional template metaprogramming for Hermite expansion coefficients
  - *Mechanism:* Zero-copy output parameters ( $23\times$  bandwidth reduction), guaranteed function inlining, exact-sized stack buffers
  - *Validation:* Microarchitectural model predicts performance within 1% error
2. **Automated Code Generation Quality:** DSL-generated template code matches hand-coded expert performance within 3.3%
  - *Validation method:* Assembly-level comparison
  - *Implication:* DSL achieves expert-level optimization without manual effort
3. **Scalability:** Framework handles diverse recurrence structures from linear 3-index (Hermite coefficients) to tetrahedral 4-index (Coulomb auxiliary integrals)
  - *Hermite coefficients:* Exponential scaling with angular momentum  $L$ , LayeredCodegen maintains consistent advantage
  - *Coulomb integrals:* Sub-quadratic scaling  $\sim O(N^{1.6})$  with efficient cache utilization

## S4. Benchmark Reproducibility

All benchmark data and scripts are available in the RECURSUM repository:

- **Benchmark source:** `benchmarks/bench_hermite_coefficients.cpp`, `benchmarks/bench_coulomb_hermite.cpp`
- **Plotting scripts:** `benchmarks/analysis/generate_benchmark_plots.py`
- **Raw data:** JSON format in `benchmarks/results/raw/hermite_coefficients.json`, `coulomb_hermite.json`
- **Figures:** Publication-ready PDFs in `benchmarks/results/figures/`
- **Analysis:** Detailed analysis in `benchmarks/results/BENCHMARK_ANALYSIS.md`

**Note:** Absolute timings may vary on different hardware, but *relative* speedups (LayeredCodegen vs. TMP vs. Hand-Written) are architecture-independent up to  $\pm 10\%$ .
